# Supplementary material
Source: MDPI journal article supplement (https://www.mdpi.com/2073-4441/13/1/33)
Supplement: s1 [file s1]

## Sheet: blank values
	measured filter area for particles < 100µm:	Raw Data
	0.5
	measured filter area for particle ≥ 100 µm:	blank samples
	1	blank 1				blank 2				blank 3				blank 4				blank 5				blank 6				blank 7				blank 8								blank x				blank x				blank x
		< 100 µm	≥ 100 µm	total	total LOG 10	< 100 µm	≥ 100 µm	total	total LOG 10	< 100 µm	≥ 100 µm	total	total LOG 10	< 100 µm	≥ 100 µm	total	total LOG 10	< 100 µm	≥ 100 µm	total	total LOG 10	< 100 µm	≥ 100 µm	total	total LOG 10	< 100 µm	≥ 100 µm	total	total LOG 10	< 100 µm	≥ 100 µm	total	total LOG 10	< 100 µm	≥ 100 µm	total	total LOG 10	< 100 µm	≥ 100 µm	total	total LOG 10	< 100 µm	≥ 100 µm	total	total LOG 10	< 100 µm	≥ 100 µm	total	total LOG 10
microplastic particles	PE	0	0	0	0	0	0	0	0	0	0	0	0	0	0	0	0	1	0	2	0.30103	6	0	12	1.07918	2	0	4	0.60206	0	0	0	0
	PET	1	0	2	0.30103	0	0	0	0	1	0	2	0.30103	0	0	0	0	1	0	2	0.30103	0	1	1	0	0	0	0	0	0	0	0	0
	PP	0	0	0	0	0	0	0	0	1	0	2	0.30103	0	0	0	0	1	2	4	0.60206	1	0	2	0.30103	0	0	0	0	0	0	0	0
	PS	0	0	0	0	0	0	0	0	0	0	0	0	0	0	0	0	0	0	0	0	0	0	0	0	0	0	0	0	0	0	0	0
	PVC	0	0	0	0	0	0	0	0	0	0	0	0	0	0	0	0	0	1	1	0	0	0	0	0	0	0	0	0	0	0	0	0
	ABS	0	0	0	0	0	0	0	0	0	0	0	0	0	0	0	0	0	0	0	0	0	0	0	0	0	0	0	0	0	0	0	0
	PU	0	0	0	0	0	0	0	0	0	0	0	0	0	0	0	0	0	0	0	0	0	0	0	0	0	0	0	0	0	0	0	0
	PC	0	0	0	0	0	0	0	0	0	0	0	0	0	0	0	0	0	0	0	0	0	0	0	0	0	0	0	0	0	0	0	0
	SAN	0	0	0	0	0	0	0	0	0	0	0	0	0	0	0	0	0	0	0	0	0	0	0	0	0	0	0	0	0	0	0	0
	PTFE/PFA
	(sonstige)	0	0	0	0	0	0	0	0	0	0	0	0		0	0	0	0	0	0	0					0	0	0	0	0	0	0	0
	(sonstige)
	(sonstige)
microplastic fibres	PE	0	0	0	0	0	0	0	0	0	0	0	0	0	0	0	0	0	0	0	0	0	0	0	0	0	0	0	0	0	0	0	0
	PET	0	1	1	0	1	1	3	0.477121	0	0	0	0	0	2	2	0.30103	0	0	0	0	0	0	0	0	0	0	0	0	0	0	0	0
	PP	0	0	0	0	0	0	0	0	0	0	0	0	0	0	0	0	0	1	1	0	0	0	0	0	0	0	0	0	0	0	0	0
	PS	0	0	0	0	0	0	0	0	0	0	0	0	0	0	0	0	0	0	0	0	0	0	0	0	0	0	0	0	0	0	0	0
	PVC	0	0	0	0	0	0	0	0	0	0	0	0	0	0	0	0	0	0	0	0	0	0	0	0	0	0	0	0	0	0	0	0
	ABS	0	0	0	0	0	0	0	0	0	0	0	0	0	0	0	0	0	0	0	0	0	0	0	0	0	0	0	0	0	0	0	0
	PU	0	0	0	0	0	0	0	0	0	0	0	0	0	0	0	0	0	0	0	0	0	0	0	0	0	0	0	0	0	0	0	0
	PC	0	0	0	0	0	0	0	0	0	0	0	0	0	0	0	0	0	0	0	0	0	0	0	0	0	0	0	0	0	0	0	0
	SAN	0	0	0	0	0	0	0	0	0	0	0	0	0	0	0	0	0	0	0	0	0	0	0	0	0	0	0	0	0	0	0	0
	PTFE/PFA
	(sonstige)																									0	0	0	0	0	0	0	0
	(sonstige)
	(sonstige)
pigmented particles	copper phtalocyanine	0	0	0	0	2	0	4	0.60206	0	0	0	0	1	0	2	0.30103	0	0	0	0	0	1	1	0	2	0	4	0.60206	0	0	0	0
	blue	0	0	0	0	0	0	0	0	0	0	0	0	0	0	0	0	0	0	0	0	0	0	0	0	0	0	0	0	0	0	0	0
	red	0	0	0	0	0	0	0	0	0	0	0	0	0	0	0	0	0	0	0	0	0	0	0	0	0	0	0	0	0	0	0	0
	orange	0	0	0	0	0	0	0	0	0	0	0	0	0	0	0	0	0	0	0	0	0	0	0	0	0	0	0	0	0	0	0	0
	yellow	0	0	0	0	0	0	0	0	0	0	0	0	0	0	0	0	0	0	0	0	0	0	0	0	0	0	0	0	0	0	0	0
	reactive black	0	0	0	0	0	0	0	0	0	0	0	0	0	0	0	0	0	0	0	0	0	0	0	0	0	0	0	0	0	0	0	0
	TiO2	0	0	0	0	0	0	0	0	0	0	0	0	0	0	0	0	0	0	0	0	0	0	0	0	0	0	0	0	0	0	0	0
	Indigo	0	0	0	0	0	0	0	0	0	0	0	0	0	0	0	0	0	0	0	0	0	0	0	0	0	0	0	0	0	0	0	0
	(sonstige)
	(sonstige)
	(sonstige)
pigmented fibres	copper phtalocyanine	0	0	0	0	0	0	0	0	0	0	0	0	0	0	0	0	0	1	1	0	0	0	0	0	0	0	0	0	0	0	0	0
	blue	0	0	0	0	0	0	0	0	0	0	0	0	0	0	0	0	0	0	0	0	0	0	0	0	0	0	0	0	0	0	0	0
	red	0	0	0	0	0	0	0	0	0	0	0	0	0	0	0	0	0	0	0	0	0	0	0	0	0	0	0	0	0	0	0	0
	orange	0	0	0	0	0	0	0	0	0	0	0	0	0	0	0	0	0	0	0	0	0	0	0	0	0	0	0	0	0	0	0	0
	yellow	0	0	0	0	0	0	0	0	0	0	0	0	0	0	0	0	0	0	0	0	0	0	0	0	0	0	0	0	0	0	0	0
	reactive black	0	0	0	0	0	0	0	0	0	0	0	0	1	0	2	0.30103	0	0	0	0	0	0	0	0	0	0	0	0	0	0	0	0
	TiO2	0	0	0	0	0	0	0	0	0	0	0	0	0	0	0	0	0	0	0	0	0	0	0	0	0	0	0	0	0	0	0	0
	Indigo	0	0	0	0	1	0	2	0.30103	1	1	3	0.477121	0	0	0	0	0	0	0	0	0	0	0	0	0	0	0	0	0	0	0	0
	(sonstige)
	(sonstige)
	(sonstige)
[truncated: 16 more columns]

## Sheet: Mannheim WWTP final clarifier
	measured filter area for particles < 100µm:	Basisdaten																																F-Test			t-Test					Welch's-test
	0.5	sample																														Basic statistics
	measured filter area for particle ≥ 100 µm:																																	significance level F-test:	0.05		significance level t-test:	0.05				significance level Welch's-test:		0.05
	1	sample 1 (for single determination (6s-test) only use column 1)			sample 1			sample 2			sample 3			sample 4			sample 5			sample 6			sample 7			sample 8			sample 9			log10 Øsample	log10 s2sample	F	Fα/2	(log10 s2blank = log10 s2sample) ?	s2p	t	tα	(log10 Øsample > log10 Øblank) ?		t	df	tα	(log10 Øsample > log10 Øblank) ?
		< 100 µm	≥ 100 µm	total	< 100 µm	≥ 100 µm	total	< 100 µm	≥ 100 µm	total	< 100 µm	≥ 100 µm	total	< 100 µm	≥ 100 µm	total	< 100 µm	≥ 100 µm	total	< 100 µm	≥ 100 µm	total	< 100 µm	≥ 100 µm	total	< 100 µm	≥ 100 µm	total	< 100 µm	≥ 100 µm	total
microplastic particles	PE				10	26	1.66276	5	20	1.47712	8	18	1.53148																			1.55712	0.00910831	17.6692	39.3552	s2BW = s2Probe	0.127197	5.42279	1.83311	Analysis result is significantly above the blank value.		-	-	-	-
	PET				17	6	1.60206	6	7	1.27875	5	3	1.11394																			1.33159	0.0616579	2.54019	6.54152	s2BW = s2Probe	0.0325807	9.97299	1.83311	Analysis result is significantly above the blank value.		-	-	-	-
	PP				3	12	1.25527	6	8	1.30103	11	8	1.47712																			1.34447	0.0137198	3.77428	39.3552	s2BW = s2Probe	0.043324	8.47295	1.83311	Analysis result is significantly above the blank value.		-	-	-	-
	PS				5	4	1.14613	4	2	1	3	1	0.845098																			0.997075	0.0226612	One of the variances is 0, i.e. variances differ!	6.54152	s2BW ≠ s2Probe	Not determinable, because of unequal variances!	#VALUE!	1.83311	Not determinable, because of unequal variances!		11.4722	2	2.91999	Analysis result is significantly above the blank value.
	PVC																															#DIV/0!	#DIV/0!	#DIV/0!	#DIV/0!	#DIV/0!	#DIV/0!	#DIV/0!	1.94318	#DIV/0!		#DIV/0!	#DIV/0!	#DIV/0!	#DIV/0!
	ABS																															#DIV/0!	#DIV/0!	#DIV/0!	#DIV/0!	#DIV/0!	#DIV/0!	#DIV/0!	1.94318	#DIV/0!		#DIV/0!	#DIV/0!	#DIV/0!	#DIV/0!
	PU																															#DIV/0!	#DIV/0!	#DIV/0!	#DIV/0!	#DIV/0!	#DIV/0!	#DIV/0!	1.94318	#DIV/0!		#DIV/0!	#DIV/0!	#DIV/0!	#DIV/0!
	PC																															#DIV/0!	#DIV/0!	#DIV/0!	#DIV/0!	#DIV/0!	#DIV/0!	#DIV/0!	1.94318	#DIV/0!		#DIV/0!	#DIV/0!	#DIV/0!	#DIV/0!
	SAN																															#DIV/0!	#DIV/0!	#DIV/0!	#DIV/0!	#DIV/0!	#DIV/0!	#DIV/0!	1.94318	#DIV/0!		#DIV/0!	#DIV/0!	#DIV/0!	#DIV/0!
	PTFE/PFA																															#DIV/0!	#DIV/0!	#DIV/0!	#DIV/0!	#DIV/0!	#DIV/0!	#DIV/0!	#NUM!	#DIV/0!		#DIV/0!	#DIV/0!	#DIV/0!	#DIV/0!
	(sonstige)																															#DIV/0!	#DIV/0!	#DIV/0!	#DIV/0!	#DIV/0!	#DIV/0!	#DIV/0!	2.01505	#DIV/0!		#DIV/0!	#DIV/0!	#DIV/0!	#DIV/0!
	(sonstige)																															#DIV/0!	#DIV/0!	#DIV/0!	#DIV/0!	#DIV/0!	#DIV/0!	#DIV/0!	#NUM!	#DIV/0!		#DIV/0!	#DIV/0!	#DIV/0!	#DIV/0!
	(sonstige)																															#DIV/0!	#DIV/0!	#DIV/0!	#DIV/0!	#DIV/0!	#DIV/0!	#DIV/0!	#NUM!	#DIV/0!		#DIV/0!	#DIV/0!	#DIV/0!	#DIV/0!
microplastic fibres	PE				0	1	0	0	0	0	0	2	0.30103																			0.100343	0.0302064	One of the variances is 0, i.e. variances differ!	6.54152	s2BW ≠ s2Probe	Not determinable, because of unequal variances!	#VALUE!	1.83311	Not determinable, because of unequal variances!		1	2	2.91999	Analysis result is not significantly above the blank value!
	PET				19	4	1.62325	9	3	1.32222	4	3	1.04139																			1.32895	0.0846733	2.44343	6.54152	s2BW = s2Probe	0.0457689	8.504	1.83311	Analysis result is significantly above the blank value.		-	-	-	-
	PP																															#DIV/0!	#DIV/0!	#DIV/0!	#DIV/0!	#DIV/0!	#DIV/0!	#DIV/0!	1.94318	#DIV/0!		#DIV/0!	#DIV/0!	#DIV/0!	#DIV/0!
	PS																															#DIV/0!	#DIV/0!	#DIV/0!	#DIV/0!	#DIV/0!	#DIV/0!	#DIV/0!	1.94318	#DIV/0!		#DIV/0!	#DIV/0!	#DIV/0!	#DIV/0!
	PVC																															#DIV/0!	#DIV/0!	#DIV/0!	#DIV/0!	#DIV/0!	#DIV/0!	#DIV/0!	1.94318	#DIV/0!		#DIV/0!	#DIV/0!	#DIV/0!	#DIV/0!
	ABS																															#DIV/0!	#DIV/0!	#DIV/0!	#DIV/0!	#DIV/0!	#DIV/0!	#DIV/0!	1.94318	#DIV/0!		#DIV/0!	#DIV/0!	#DIV/0!	#DIV/0!
	PU																															#DIV/0!	#DIV/0!	#DIV/0!	#DIV/0!	#DIV/0!	#DIV/0!	#DIV/0!	1.94318	#DIV/0!		#DIV/0!	#DIV/0!	#DIV/0!	#DIV/0!
	PC																															#DIV/0!	#DIV/0!	#DIV/0!	#DIV/0!	#DIV/0!	#DIV/0!	#DIV/0!	1.94318	#DIV/0!		#DIV/0!	#DIV/0!	#DIV/0!	#DIV/0!
	SAN																															#DIV/0!	#DIV/0!	#DIV/0!	#DIV/0!	#DIV/0!	#DIV/0!	#DIV/0!	1.94318	#DIV/0!		#DIV/0!	#DIV/0!	#DIV/0!	#DIV/0!
	PTFE/PFA																															#DIV/0!	#DIV/0!	#DIV/0!	#DIV/0!	#DIV/0!	#DIV/0!	#DIV/0!	#NUM!	#DIV/0!		#DIV/0!	#DIV/0!	#DIV/0!	#DIV/0!
	(sonstige)				0	0	0	0	0	0	1	0	0.30103																			0.100343	0.0302064	One of the variances is 0, i.e. variances differ!	799.5	s2BW ≠ s2Probe	Not determinable, because of unequal variances!	#VALUE!	2.35336	Not determinable, because of unequal variances!		1	2	2.91999	Analysis result is not significantly above the blank value!
	(sonstige)																															#DIV/0!	#DIV/0!	#DIV/0!	#DIV/0!	#DIV/0!	#DIV/0!	#DIV/0!	#NUM!	#DIV/0!		#DIV/0!	#DIV/0!	#DIV/0!	#DIV/0!
	(sonstige)																															#DIV/0!	#DIV/0!	#DIV/0!	#DIV/0!	#DIV/0!	#DIV/0!	#DIV/0!	#NUM!	#DIV/0!		#DIV/0!	#DIV/0!	#DIV/0!	#DIV/0!
pigmented particles	copper phtalocyanine				0	0	0	0	0	0	1	1	0.477121																			0.15904	0.0758816	1.00229	39.3552	s2BW = s2Probe	0.0760167	-0.155918	1.83311	Analysis result is not significantly above the blank value.		-	-	-	-
	blue																															#DIV/0!	#DIV/0!	#DIV/0!	#DIV/0!	#DIV/0!	#DIV/0!	#DIV/0!	1.94318	#DIV/0!		#DIV/0!	#DIV/0!	#DIV/0!	#DIV/0!
	red																															#DIV/0!	#DIV/0!	#DIV/0!	#DIV/0!	#DIV/0!	#DIV/0!	#DIV/0!	1.94318	#DIV/0!		#DIV/0!	#DIV/0!	#DIV/0!	#DIV/0!
	orange																															#DIV/0!	#DIV/0!	#DIV/0!	#DIV/0!	#DIV/0!	#DIV/0!	#DIV/0!	1.94318	#DIV/0!		#DIV/0!	#DIV/0!	#DIV/0!	#DIV/0!
	yellow																															#DIV/0!	#DIV/0!	#DIV/0!	#DIV/0!	#DIV/0!	#DIV/0!	#DIV/0!	1.94318	#DIV/0!		#DIV/0!	#DIV/0!	#DIV/0!	#DIV/0!
	reactive black																															#DIV/0!	#DIV/0!	#DIV/0!	#DIV/0!	#DIV/0!	#DIV/0!	#DIV/0!	1.94318	#DIV/0!		#DIV/0!	#DIV/0!	#DIV/0!	#DIV/0!
	TiO2																															#DIV/0!	#DIV/0!	#DIV/0!	#DIV/0!	#DIV/0!	#DIV/0!	#DIV/0!	1.94318	#DIV/0!		#DIV/0!	#DIV/0!	#DIV/0!	#DIV/0!
	Indigo																															#DIV/0!	#DIV/0!	#DIV/0!	#DIV/0!	#DIV/0!	#DIV/0!	#DIV/0!	1.94318	#DIV/0!		#DIV/0!	#DIV/0!	#DIV/0!	#DIV/0!
	(sonstige)																															#DIV/0!	#DIV/0!	#DIV/0!	#DIV/0!	#DIV/0!	#DIV/0!	#DIV/0!	#NUM!	#DIV/0!		#DIV/0!	#DIV/0!	#DIV/0!	#DIV/0!
	(sonstige)																															#DIV/0!	#DIV/0!	#DIV/0!	#DIV/0!	#DIV/0!	#DIV/0!	#DIV/0!	#NUM!	#DIV/0!		#DIV/0!	#DIV/0!	#DIV/0!	#DIV/0!
	(sonstige)																															#DIV/0!	#DIV/0!	#DIV/0!	#DIV/0!	#DIV/0!	#DIV/0!	#DIV/0!	#NUM!	#DIV/0!		#DIV/0!	#DIV/0!	#DIV/0!	#DIV/0!
pigmented fibres	copper phtalocyanine				0	0	0	0	0	0	0	1	0																			0	0	One of the variances is 0, i.e. variances differ!	39.3552	s2BW ≠ s2Probe	Not determinable, because of unequal variances!	#VALUE!	1.83311	Not determinable, because of unequal variances!		#DIV/0!	#DIV/0!	#DIV/0!	Analysis result is not significantly above the blank value!
	blue																															#DIV/0!	#DIV/0!	#DIV/0!	#DIV/0!	#DIV/0!	#DIV/0!	#DIV/0!	1.94318	#DIV/0!		#DIV/0!	#DIV/0!	#DIV/0!	#DIV/0!
	red																															#DIV/0!	#DIV/0!	#DIV/0!	#DIV/0!	#DIV/0!	#DIV/0!	#DIV/0!	1.94318	#DIV/0!		#DIV/0!	#DIV/0!	#DIV/0!	#DIV/0!
	orange																															#DIV/0!	#DIV/0!	#DIV/0!	#DIV/0!	#DIV/0!	#DIV/0!	#DIV/0!	1.94318	#DIV/0!		#DIV/0!	#DIV/0!	#DIV/0!	#DIV/0!
	yellow																															#DIV/0!	#DIV/0!	#DIV/0!	#DIV/0!	#DIV/0!	#DIV/0!	#DIV/0!	1.94318	#DIV/0!		#DIV/0!	#DIV/0!	#DIV/0!	#DIV/0!
	reactive black																															#DIV/0!	#DIV/0!	#DIV/0!	#DIV/0!	#DIV/0!	#DIV/0!	#DIV/0!	1.94318	#DIV/0!		#DIV/0!	#DIV/0!	#DIV/0!	#DIV/0!
	TiO2																															#DIV/0!	#DIV/0!	#DIV/0!	#DIV/0!	#DIV/0!	#DIV/0!	#DIV/0!	1.94318	#DIV/0!		#DIV/0!	#DIV/0!	#DIV/0!	#DIV/0!
	Indigo																															#DIV/0!	#DIV/0!	#DIV/0!	#DIV/0!	#DIV/0!	#DIV/0!	#DIV/0!	1.94318	#DIV/0!		#DIV/0!	#DIV/0!	#DIV/0!	#DIV/0!
	(sonstige)																															#DIV/0!	#DIV/0!	#DIV/0!	#DIV/0!	#DIV/0!	#DIV/0!	#DIV/0!	#NUM!	#DIV/0!		#DIV/0!	#DIV/0!	#DIV/0!	#DIV/0!
	(sonstige)																															#DIV/0!	#DIV/0!	#DIV/0!	#DIV/0!	#DIV/0!	#DIV/0!	#DIV/0!	#NUM!	#DIV/0!		#DIV/0!	#DIV/0!	#DIV/0!	#DIV/0!
	(sonstige)																															#DIV/0!	#DIV/0!	#DIV/0!	#DIV/0!	#DIV/0!	#DIV/0!	#DIV/0!	#NUM!	#DIV/0!		#DIV/0!	#DIV/0!	#DIV/0!	#DIV/0!

## Sheet: Mannheim WWTP sand filter
	measured filter area for particles < 100µm:	Basisdaten																																F-Test			t-Test					Welch's-test
	0.5	sample																														Basic statistics
	measured filter area for particle ≥ 100 µm:																																	significance level F-test:	0.05		significance level t-test:	0.05				significance level Welch's-test:		0.05
	1	sample 1 (for single determination (6s-test) only use column 1)			sample 1			sample 2			sample 3			sample 4			sample 5			sample 6			sample 7			sample 8			sample 9			log10 Øsample	log10 s2sample	F	Fα/2	(log10 s2blank = log10 s2sample) ?	s2p	t	tα	(log10 Øsample > log10 Øblank) ?		t	df	tα	(log10 Øsample > log10 Øblank) ?
		< 100 µm	≥ 100 µm	total	< 100 µm	≥ 100 µm	total	< 100 µm	≥ 100 µm	total	< 100 µm	≥ 100 µm	total	< 100 µm	≥ 100 µm	total	< 100 µm	≥ 100 µm	total	< 100 µm	≥ 100 µm	total	< 100 µm	≥ 100 µm	total	< 100 µm	≥ 100 µm	total	< 100 µm	≥ 100 µm	total
microplastic particles	PE				13	5	1.49136	4	4	1.07918	6	1	1.11394																			1.22816	0.0522576	3.07967	39.3552	s2BW = s2Probe	0.136785	3.91546	1.83311	Analysis result is significantly above the blank value.		-	-	-	-
	PET				4	3	1.04139	0	0	0	0	1	0																			0.347131	0.3615	14.8931	6.54152	s2BW ≠ s2Probe	Not determinable, because of unequal variances!	#VALUE!	1.83311	Not determinable, because of unequal variances!		0.666464	2	2.91999	Analysis result is not significantly above the blank value!
	PP				1	4	0.778151	0	0	0	0	1	0																			0.259384	0.20184	3.89785	6.54152	s2BW = s2Probe	0.0851284	0.551157	1.83311	Analysis result is not significantly above the blank value.		-	-	-	-
	PS																															#DIV/0!	#DIV/0!	#DIV/0!	#DIV/0!	#DIV/0!	#DIV/0!	#DIV/0!	1.94318	#DIV/0!		#DIV/0!	#DIV/0!	#DIV/0!	#DIV/0!
	PVC																															#DIV/0!	#DIV/0!	#DIV/0!	#DIV/0!	#DIV/0!	#DIV/0!	#DIV/0!	1.94318	#DIV/0!		#DIV/0!	#DIV/0!	#DIV/0!	#DIV/0!
	ABS																															#DIV/0!	#DIV/0!	#DIV/0!	#DIV/0!	#DIV/0!	#DIV/0!	#DIV/0!	1.94318	#DIV/0!		#DIV/0!	#DIV/0!	#DIV/0!	#DIV/0!
	PU																															#DIV/0!	#DIV/0!	#DIV/0!	#DIV/0!	#DIV/0!	#DIV/0!	#DIV/0!	1.94318	#DIV/0!		#DIV/0!	#DIV/0!	#DIV/0!	#DIV/0!
	PC																															#DIV/0!	#DIV/0!	#DIV/0!	#DIV/0!	#DIV/0!	#DIV/0!	#DIV/0!	1.94318	#DIV/0!		#DIV/0!	#DIV/0!	#DIV/0!	#DIV/0!
	SAN																															#DIV/0!	#DIV/0!	#DIV/0!	#DIV/0!	#DIV/0!	#DIV/0!	#DIV/0!	1.94318	#DIV/0!		#DIV/0!	#DIV/0!	#DIV/0!	#DIV/0!
	PTFE/PFA																															#DIV/0!	#DIV/0!	#DIV/0!	#DIV/0!	#DIV/0!	#DIV/0!	#DIV/0!	#NUM!	#DIV/0!		#DIV/0!	#DIV/0!	#DIV/0!	#DIV/0!
	(sonstige)																															#DIV/0!	#DIV/0!	#DIV/0!	#DIV/0!	#DIV/0!	#DIV/0!	#DIV/0!	2.01505	#DIV/0!		#DIV/0!	#DIV/0!	#DIV/0!	#DIV/0!
	(sonstige)																															#DIV/0!	#DIV/0!	#DIV/0!	#DIV/0!	#DIV/0!	#DIV/0!	#DIV/0!	#NUM!	#DIV/0!		#DIV/0!	#DIV/0!	#DIV/0!	#DIV/0!
	(sonstige)																															#DIV/0!	#DIV/0!	#DIV/0!	#DIV/0!	#DIV/0!	#DIV/0!	#DIV/0!	#NUM!	#DIV/0!		#DIV/0!	#DIV/0!	#DIV/0!	#DIV/0!
microplastic fibres	PE																															#DIV/0!	#DIV/0!	#DIV/0!	#DIV/0!	#DIV/0!	#DIV/0!	#DIV/0!	1.94318	#DIV/0!		#DIV/0!	#DIV/0!	#DIV/0!	#DIV/0!
	PET				0	1	0	0	0	0	0	0	0																			0	0	One of the variances is 0, i.e. variances differ!	39.3552	s2BW ≠ s2Probe	Not determinable, because of unequal variances!	#VALUE!	1.83311	Not determinable, because of unequal variances!		-1.4779	7	1.89458	Analysis result is not significantly above the blank value!
	PP				0	1	0	0	0	0	0	0	0																			0	0	One of the variances is 0, i.e. variances differ!	39.3552	s2BW ≠ s2Probe	Not determinable, because of unequal variances!	#VALUE!	1.83311	Not determinable, because of unequal variances!		#DIV/0!	#DIV/0!	#DIV/0!	Analysis result is not significantly above the blank value!
	PS																															#DIV/0!	#DIV/0!	#DIV/0!	#DIV/0!	#DIV/0!	#DIV/0!	#DIV/0!	1.94318	#DIV/0!		#DIV/0!	#DIV/0!	#DIV/0!	#DIV/0!
	PVC																															#DIV/0!	#DIV/0!	#DIV/0!	#DIV/0!	#DIV/0!	#DIV/0!	#DIV/0!	1.94318	#DIV/0!		#DIV/0!	#DIV/0!	#DIV/0!	#DIV/0!
	ABS																															#DIV/0!	#DIV/0!	#DIV/0!	#DIV/0!	#DIV/0!	#DIV/0!	#DIV/0!	1.94318	#DIV/0!		#DIV/0!	#DIV/0!	#DIV/0!	#DIV/0!
	PU																															#DIV/0!	#DIV/0!	#DIV/0!	#DIV/0!	#DIV/0!	#DIV/0!	#DIV/0!	1.94318	#DIV/0!		#DIV/0!	#DIV/0!	#DIV/0!	#DIV/0!
	PC																															#DIV/0!	#DIV/0!	#DIV/0!	#DIV/0!	#DIV/0!	#DIV/0!	#DIV/0!	1.94318	#DIV/0!		#DIV/0!	#DIV/0!	#DIV/0!	#DIV/0!
	SAN																															#DIV/0!	#DIV/0!	#DIV/0!	#DIV/0!	#DIV/0!	#DIV/0!	#DIV/0!	1.94318	#DIV/0!		#DIV/0!	#DIV/0!	#DIV/0!	#DIV/0!
	PTFE/PFA																															#DIV/0!	#DIV/0!	#DIV/0!	#DIV/0!	#DIV/0!	#DIV/0!	#DIV/0!	#NUM!	#DIV/0!		#DIV/0!	#DIV/0!	#DIV/0!	#DIV/0!
	(sonstige)																															#DIV/0!	#DIV/0!	#DIV/0!	#DIV/0!	#DIV/0!	#DIV/0!	#DIV/0!	#NUM!	#DIV/0!		#DIV/0!	#DIV/0!	#DIV/0!	#DIV/0!
	(sonstige)																															#DIV/0!	#DIV/0!	#DIV/0!	#DIV/0!	#DIV/0!	#DIV/0!	#DIV/0!	#NUM!	#DIV/0!		#DIV/0!	#DIV/0!	#DIV/0!	#DIV/0!
	(sonstige)																															#DIV/0!	#DIV/0!	#DIV/0!	#DIV/0!	#DIV/0!	#DIV/0!	#DIV/0!	#NUM!	#DIV/0!		#DIV/0!	#DIV/0!	#DIV/0!	#DIV/0!
pigmented particles	copper phtalocyanine				0	0	0	0	0	0	1	0	0.30103																			0.100343	0.0302064	2.51786	39.3552	s2BW = s2Probe	0.0658666	-0.505328	1.83311	Analysis result is not significantly above the blank value.		-	-	-	-
	blue																															#DIV/0!	#DIV/0!	#DIV/0!	#DIV/0!	#DIV/0!	#DIV/0!	#DIV/0!	1.94318	#DIV/0!		#DIV/0!	#DIV/0!	#DIV/0!	#DIV/0!
	red																															#DIV/0!	#DIV/0!	#DIV/0!	#DIV/0!	#DIV/0!	#DIV/0!	#DIV/0!	1.94318	#DIV/0!		#DIV/0!	#DIV/0!	#DIV/0!	#DIV/0!
	orange																															#DIV/0!	#DIV/0!	#DIV/0!	#DIV/0!	#DIV/0!	#DIV/0!	#DIV/0!	1.94318	#DIV/0!		#DIV/0!	#DIV/0!	#DIV/0!	#DIV/0!
	yellow																															#DIV/0!	#DIV/0!	#DIV/0!	#DIV/0!	#DIV/0!	#DIV/0!	#DIV/0!	1.94318	#DIV/0!		#DIV/0!	#DIV/0!	#DIV/0!	#DIV/0!
	reactive black																															#DIV/0!	#DIV/0!	#DIV/0!	#DIV/0!	#DIV/0!	#DIV/0!	#DIV/0!	1.94318	#DIV/0!		#DIV/0!	#DIV/0!	#DIV/0!	#DIV/0!
	TiO2																															#DIV/0!	#DIV/0!	#DIV/0!	#DIV/0!	#DIV/0!	#DIV/0!	#DIV/0!	1.94318	#DIV/0!		#DIV/0!	#DIV/0!	#DIV/0!	#DIV/0!
	Indigo																															#DIV/0!	#DIV/0!	#DIV/0!	#DIV/0!	#DIV/0!	#DIV/0!	#DIV/0!	1.94318	#DIV/0!		#DIV/0!	#DIV/0!	#DIV/0!	#DIV/0!
	(sonstige)																															#DIV/0!	#DIV/0!	#DIV/0!	#DIV/0!	#DIV/0!	#DIV/0!	#DIV/0!	#NUM!	#DIV/0!		#DIV/0!	#DIV/0!	#DIV/0!	#DIV/0!
	(sonstige)																															#DIV/0!	#DIV/0!	#DIV/0!	#DIV/0!	#DIV/0!	#DIV/0!	#DIV/0!	#NUM!	#DIV/0!		#DIV/0!	#DIV/0!	#DIV/0!	#DIV/0!
	(sonstige)																															#DIV/0!	#DIV/0!	#DIV/0!	#DIV/0!	#DIV/0!	#DIV/0!	#DIV/0!	#NUM!	#DIV/0!		#DIV/0!	#DIV/0!	#DIV/0!	#DIV/0!
pigmented fibres	copper phtalocyanine																															#DIV/0!	#DIV/0!	#DIV/0!	#DIV/0!	#DIV/0!	#DIV/0!	#DIV/0!	1.94318	#DIV/0!		#DIV/0!	#DIV/0!	#DIV/0!	#DIV/0!
	blue																															#DIV/0!	#DIV/0!	#DIV/0!	#DIV/0!	#DIV/0!	#DIV/0!	#DIV/0!	1.94318	#DIV/0!		#DIV/0!	#DIV/0!	#DIV/0!	#DIV/0!
	red																															#DIV/0!	#DIV/0!	#DIV/0!	#DIV/0!	#DIV/0!	#DIV/0!	#DIV/0!	1.94318	#DIV/0!		#DIV/0!	#DIV/0!	#DIV/0!	#DIV/0!
	orange																															#DIV/0!	#DIV/0!	#DIV/0!	#DIV/0!	#DIV/0!	#DIV/0!	#DIV/0!	1.94318	#DIV/0!		#DIV/0!	#DIV/0!	#DIV/0!	#DIV/0!
	yellow																															#DIV/0!	#DIV/0!	#DIV/0!	#DIV/0!	#DIV/0!	#DIV/0!	#DIV/0!	1.94318	#DIV/0!		#DIV/0!	#DIV/0!	#DIV/0!	#DIV/0!
	reactive black																															#DIV/0!	#DIV/0!	#DIV/0!	#DIV/0!	#DIV/0!	#DIV/0!	#DIV/0!	1.94318	#DIV/0!		#DIV/0!	#DIV/0!	#DIV/0!	#DIV/0!
	TiO2																															#DIV/0!	#DIV/0!	#DIV/0!	#DIV/0!	#DIV/0!	#DIV/0!	#DIV/0!	1.94318	#DIV/0!		#DIV/0!	#DIV/0!	#DIV/0!	#DIV/0!
	Indigo																															#DIV/0!	#DIV/0!	#DIV/0!	#DIV/0!	#DIV/0!	#DIV/0!	#DIV/0!	1.94318	#DIV/0!		#DIV/0!	#DIV/0!	#DIV/0!	#DIV/0!
	(sonstige)																															#DIV/0!	#DIV/0!	#DIV/0!	#DIV/0!	#DIV/0!	#DIV/0!	#DIV/0!	#NUM!	#DIV/0!		#DIV/0!	#DIV/0!	#DIV/0!	#DIV/0!
	(sonstige)																															#DIV/0!	#DIV/0!	#DIV/0!	#DIV/0!	#DIV/0!	#DIV/0!	#DIV/0!	#NUM!	#DIV/0!		#DIV/0!	#DIV/0!	#DIV/0!	#DIV/0!
	(sonstige)																															#DIV/0!	#DIV/0!	#DIV/0!	#DIV/0!	#DIV/0!	#DIV/0!	#DIV/0!	#NUM!	#DIV/0!		#DIV/0!	#DIV/0!	#DIV/0!	#DIV/0!

## Sheet: Frankfurt WWTP final clarifier
	measured filter area for particles < 100µm:	Basisdaten																																F-Test			t-Test					Welch's-test
	0.5	sample																														Basic statistics
	measured filter area for particle ≥ 100 µm:																																	significance level F-test:	0.05		significance level t-test:	0.05				significance level Welch's-test:		0.05
	1	sample 1 (for single determination (6s-test) only use column 1)			sample 1			sample 2			sample 3			sample 4			sample 5			sample 6			sample 7			sample 8			sample 9			log10 Øsample	log10 s2sample	F	Fα/2	(log10 s2blank = log10 s2sample) ?	s2p	t	tα	(log10 Øsample > log10 Øblank) ?		t	df	tα	(log10 Øsample > log10 Øblank) ?
		< 100 µm	≥ 100 µm	total	< 100 µm	≥ 100 µm	total	< 100 µm	≥ 100 µm	total	< 100 µm	≥ 100 µm	total	< 100 µm	≥ 100 µm	total	< 100 µm	≥ 100 µm	total	< 100 µm	≥ 100 µm	total	< 100 µm	≥ 100 µm	total	< 100 µm	≥ 100 µm	total	< 100 µm	≥ 100 µm	total
microplastic particles	PE				16	22	1.73239	4	12	1.30103	5	11	1.32222																			1.45188	0.0591278	2.72183	39.3552	s2BW = s2Probe	0.138312	4.78234	1.83311	Analysis result is significantly above the blank value.		-	-	-	-
	PET				9	0	1.25527	1	0	0.30103	0	0	0																			0.518768	0.429484	17.6939	6.54152	s2BW ≠ s2Probe	Not determinable, because of unequal variances!	#VALUE!	1.83311	Not determinable, because of unequal variances!		1.06153	2	2.91999	Analysis result is not significantly above the blank value!
	PP				5	7	1.23045	5	9	1.27875	1	7	0.954243																			1.15448	0.0306551	1.68919	39.3552	s2BW = s2Probe	0.0470874	6.83402	1.83311	Analysis result is significantly above the blank value.		-	-	-	-
	PS				3	0	0.778151	4	0	0.90309	1	0	0.30103																			0.660757	0.100955	One of the variances is 0, i.e. variances differ!	6.54152	s2BW ≠ s2Probe	Not determinable, because of unequal variances!	#VALUE!	1.83311	Not determinable, because of unequal variances!		3.60196	2	2.91999	Analysis result is significantly above the blank value.
	PVC																															#DIV/0!	#DIV/0!	#DIV/0!	#DIV/0!	#DIV/0!	#DIV/0!	#DIV/0!	1.94318	#DIV/0!		#DIV/0!	#DIV/0!	#DIV/0!	#DIV/0!
	ABS																															#DIV/0!	#DIV/0!	#DIV/0!	#DIV/0!	#DIV/0!	#DIV/0!	#DIV/0!	1.94318	#DIV/0!		#DIV/0!	#DIV/0!	#DIV/0!	#DIV/0!
	PU																															#DIV/0!	#DIV/0!	#DIV/0!	#DIV/0!	#DIV/0!	#DIV/0!	#DIV/0!	1.94318	#DIV/0!		#DIV/0!	#DIV/0!	#DIV/0!	#DIV/0!
	PC																															#DIV/0!	#DIV/0!	#DIV/0!	#DIV/0!	#DIV/0!	#DIV/0!	#DIV/0!	1.94318	#DIV/0!		#DIV/0!	#DIV/0!	#DIV/0!	#DIV/0!
	SAN																															#DIV/0!	#DIV/0!	#DIV/0!	#DIV/0!	#DIV/0!	#DIV/0!	#DIV/0!	1.94318	#DIV/0!		#DIV/0!	#DIV/0!	#DIV/0!	#DIV/0!
	PTFE/PFA																															#DIV/0!	#DIV/0!	#DIV/0!	#DIV/0!	#DIV/0!	#DIV/0!	#DIV/0!	#NUM!	#DIV/0!		#DIV/0!	#DIV/0!	#DIV/0!	#DIV/0!
	(sonstige)																															#DIV/0!	#DIV/0!	#DIV/0!	#DIV/0!	#DIV/0!	#DIV/0!	#DIV/0!	2.01505	#DIV/0!		#DIV/0!	#DIV/0!	#DIV/0!	#DIV/0!
	(sonstige)																															#DIV/0!	#DIV/0!	#DIV/0!	#DIV/0!	#DIV/0!	#DIV/0!	#DIV/0!	#NUM!	#DIV/0!		#DIV/0!	#DIV/0!	#DIV/0!	#DIV/0!
	(sonstige)																															#DIV/0!	#DIV/0!	#DIV/0!	#DIV/0!	#DIV/0!	#DIV/0!	#DIV/0!	#NUM!	#DIV/0!		#DIV/0!	#DIV/0!	#DIV/0!	#DIV/0!
microplastic fibres	PE				0	1	0	0	0	0	0	0	0																			0	0	One of the variances is 0, i.e. variances differ!	39.3552	s2BW ≠ s2Probe	Not determinable, because of unequal variances!	#VALUE!	1.83311	Not determinable, because of unequal variances!		#DIV/0!	#DIV/0!	#DIV/0!	Analysis result is not significantly above the blank value!
	PET				6	1	1.11394	0	3	0.477121	2	1	0.69897																			0.763345	0.104494	3.01539	6.54152	s2BW = s2Probe	0.0501735	4.39234	1.83311	Analysis result is significantly above the blank value.		-	-	-	-
	PP																															#DIV/0!	#DIV/0!	#DIV/0!	#DIV/0!	#DIV/0!	#DIV/0!	#DIV/0!	1.94318	#DIV/0!		#DIV/0!	#DIV/0!	#DIV/0!	#DIV/0!
	PS																															#DIV/0!	#DIV/0!	#DIV/0!	#DIV/0!	#DIV/0!	#DIV/0!	#DIV/0!	1.94318	#DIV/0!		#DIV/0!	#DIV/0!	#DIV/0!	#DIV/0!
	PVC																															#DIV/0!	#DIV/0!	#DIV/0!	#DIV/0!	#DIV/0!	#DIV/0!	#DIV/0!	1.94318	#DIV/0!		#DIV/0!	#DIV/0!	#DIV/0!	#DIV/0!
	ABS																															#DIV/0!	#DIV/0!	#DIV/0!	#DIV/0!	#DIV/0!	#DIV/0!	#DIV/0!	1.94318	#DIV/0!		#DIV/0!	#DIV/0!	#DIV/0!	#DIV/0!
	PU																															#DIV/0!	#DIV/0!	#DIV/0!	#DIV/0!	#DIV/0!	#DIV/0!	#DIV/0!	1.94318	#DIV/0!		#DIV/0!	#DIV/0!	#DIV/0!	#DIV/0!
	PC																															#DIV/0!	#DIV/0!	#DIV/0!	#DIV/0!	#DIV/0!	#DIV/0!	#DIV/0!	1.94318	#DIV/0!		#DIV/0!	#DIV/0!	#DIV/0!	#DIV/0!
	SAN																															#DIV/0!	#DIV/0!	#DIV/0!	#DIV/0!	#DIV/0!	#DIV/0!	#DIV/0!	1.94318	#DIV/0!		#DIV/0!	#DIV/0!	#DIV/0!	#DIV/0!
	PTFE/PFA																															#DIV/0!	#DIV/0!	#DIV/0!	#DIV/0!	#DIV/0!	#DIV/0!	#DIV/0!	#NUM!	#DIV/0!		#DIV/0!	#DIV/0!	#DIV/0!	#DIV/0!
	(sonstige)																															#DIV/0!	#DIV/0!	#DIV/0!	#DIV/0!	#DIV/0!	#DIV/0!	#DIV/0!	#NUM!	#DIV/0!		#DIV/0!	#DIV/0!	#DIV/0!	#DIV/0!
	(sonstige)																															#DIV/0!	#DIV/0!	#DIV/0!	#DIV/0!	#DIV/0!	#DIV/0!	#DIV/0!	#NUM!	#DIV/0!		#DIV/0!	#DIV/0!	#DIV/0!	#DIV/0!
	(sonstige)																															#DIV/0!	#DIV/0!	#DIV/0!	#DIV/0!	#DIV/0!	#DIV/0!	#DIV/0!	#NUM!	#DIV/0!		#DIV/0!	#DIV/0!	#DIV/0!	#DIV/0!
pigmented particles	copper phtalocyanine				21	0	1.62325	0	0	0	0	0	0																			0.541083	0.878313	11.5483	6.54152	s2BW ≠ s2Probe	Not determinable, because of unequal variances!	#VALUE!	1.83311	Not determinable, because of unequal variances!		0.641944	2	2.91999	Analysis result is not significantly above the blank value!
	blue																															#DIV/0!	#DIV/0!	#DIV/0!	#DIV/0!	#DIV/0!	#DIV/0!	#DIV/0!	1.94318	#DIV/0!		#DIV/0!	#DIV/0!	#DIV/0!	#DIV/0!
	red				17	0	1.53148	0	0	0	0	0	0																			0.510493	0.781809	One of the variances is 0, i.e. variances differ!	6.54152	s2BW ≠ s2Probe	Not determinable, because of unequal variances!	#VALUE!	1.83311	Not determinable, because of unequal variances!		1	2	2.91999	Analysis result is not significantly above the blank value!
	orange																															#DIV/0!	#DIV/0!	#DIV/0!	#DIV/0!	#DIV/0!	#DIV/0!	#DIV/0!	1.94318	#DIV/0!		#DIV/0!	#DIV/0!	#DIV/0!	#DIV/0!
	yellow																															#DIV/0!	#DIV/0!	#DIV/0!	#DIV/0!	#DIV/0!	#DIV/0!	#DIV/0!	1.94318	#DIV/0!		#DIV/0!	#DIV/0!	#DIV/0!	#DIV/0!
	reactive black																															#DIV/0!	#DIV/0!	#DIV/0!	#DIV/0!	#DIV/0!	#DIV/0!	#DIV/0!	1.94318	#DIV/0!		#DIV/0!	#DIV/0!	#DIV/0!	#DIV/0!
	TiO2																															#DIV/0!	#DIV/0!	#DIV/0!	#DIV/0!	#DIV/0!	#DIV/0!	#DIV/0!	1.94318	#DIV/0!		#DIV/0!	#DIV/0!	#DIV/0!	#DIV/0!
	Indigo																															#DIV/0!	#DIV/0!	#DIV/0!	#DIV/0!	#DIV/0!	#DIV/0!	#DIV/0!	1.94318	#DIV/0!		#DIV/0!	#DIV/0!	#DIV/0!	#DIV/0!
	(sonstige)																															#DIV/0!	#DIV/0!	#DIV/0!	#DIV/0!	#DIV/0!	#DIV/0!	#DIV/0!	#NUM!	#DIV/0!		#DIV/0!	#DIV/0!	#DIV/0!	#DIV/0!
	(sonstige)																															#DIV/0!	#DIV/0!	#DIV/0!	#DIV/0!	#DIV/0!	#DIV/0!	#DIV/0!	#NUM!	#DIV/0!		#DIV/0!	#DIV/0!	#DIV/0!	#DIV/0!
	(sonstige)																															#DIV/0!	#DIV/0!	#DIV/0!	#DIV/0!	#DIV/0!	#DIV/0!	#DIV/0!	#NUM!	#DIV/0!		#DIV/0!	#DIV/0!	#DIV/0!	#DIV/0!
pigmented fibres	copper phtalocyanine																															#DIV/0!	#DIV/0!	#DIV/0!	#DIV/0!	#DIV/0!	#DIV/0!	#DIV/0!	1.94318	#DIV/0!		#DIV/0!	#DIV/0!	#DIV/0!	#DIV/0!
	blue																															#DIV/0!	#DIV/0!	#DIV/0!	#DIV/0!	#DIV/0!	#DIV/0!	#DIV/0!	1.94318	#DIV/0!		#DIV/0!	#DIV/0!	#DIV/0!	#DIV/0!
	red																															#DIV/0!	#DIV/0!	#DIV/0!	#DIV/0!	#DIV/0!	#DIV/0!	#DIV/0!	1.94318	#DIV/0!		#DIV/0!	#DIV/0!	#DIV/0!	#DIV/0!
	orange																															#DIV/0!	#DIV/0!	#DIV/0!	#DIV/0!	#DIV/0!	#DIV/0!	#DIV/0!	1.94318	#DIV/0!		#DIV/0!	#DIV/0!	#DIV/0!	#DIV/0!
	yellow																															#DIV/0!	#DIV/0!	#DIV/0!	#DIV/0!	#DIV/0!	#DIV/0!	#DIV/0!	1.94318	#DIV/0!		#DIV/0!	#DIV/0!	#DIV/0!	#DIV/0!
	reactive black																															#DIV/0!	#DIV/0!	#DIV/0!	#DIV/0!	#DIV/0!	#DIV/0!	#DIV/0!	1.94318	#DIV/0!		#DIV/0!	#DIV/0!	#DIV/0!	#DIV/0!
	TiO2																															#DIV/0!	#DIV/0!	#DIV/0!	#DIV/0!	#DIV/0!	#DIV/0!	#DIV/0!	1.94318	#DIV/0!		#DIV/0!	#DIV/0!	#DIV/0!	#DIV/0!
	Indigo																															#DIV/0!	#DIV/0!	#DIV/0!	#DIV/0!	#DIV/0!	#DIV/0!	#DIV/0!	1.94318	#DIV/0!		#DIV/0!	#DIV/0!	#DIV/0!	#DIV/0!
	(sonstige)				0	0	0	1	0	0.30103	0	0	0																			0.100343	0.0302064	#DIV/0!	#DIV/0!	#DIV/0!	#DIV/0!	#DIV/0!	6.31375	#DIV/0!		#DIV/0!	#DIV/0!	#DIV/0!	#DIV/0!
	(sonstige)																															#DIV/0!	#DIV/0!	#DIV/0!	#DIV/0!	#DIV/0!	#DIV/0!	#DIV/0!	#NUM!	#DIV/0!		#DIV/0!	#DIV/0!	#DIV/0!	#DIV/0!
	(sonstige)																															#DIV/0!	#DIV/0!	#DIV/0!	#DIV/0!	#DIV/0!	#DIV/0!	#DIV/0!	#NUM!	#DIV/0!		#DIV/0!	#DIV/0!	#DIV/0!	#DIV/0!

## Sheet: Frankfurt WWTP sand filter
	measured filter area for particles < 100µm:	Basisdaten																																F-Test			t-Test					Welch's-test
	0.5	sample																														Basic statistics
	measured filter area for particle ≥ 100 µm:																																	significance level F-test:	0.05		significance level t-test:	0.05				significance level Welch's-test:		0.05
	1	sample 1 (for single determination (6s-test) only use column 1)			sample 1			sample 2			sample 3			sample 4			sample 5			sample 6			sample 7			sample 8			sample 9			log10 Øsample	log10 s2sample	F	Fα/2	(log10 s2blank = log10 s2sample) ?	s2p	t	tα	(log10 Øsample > log10 Øblank) ?		t	df	tα	(log10 Øsample > log10 Øblank) ?
		< 100 µm	≥ 100 µm	total	< 100 µm	≥ 100 µm	total	< 100 µm	≥ 100 µm	total	< 100 µm	≥ 100 µm	total	< 100 µm	≥ 100 µm	total	< 100 µm	≥ 100 µm	total	< 100 µm	≥ 100 µm	total	< 100 µm	≥ 100 µm	total	< 100 µm	≥ 100 µm	total	< 100 µm	≥ 100 µm	total
microplastic particles	PE				17	3	1.5682	1	0	0.30103	32	26	1.95424																			1.27449	0.747977	4.64767	6.54152	s2BW = s2Probe	0.29139	2.80943	1.83311	Analysis result is significantly above the blank value.		-	-	-	-
	PET				6	6	1.25527	1	0	0.30103	0	1	0																			0.518768	0.429484	17.6939	6.54152	s2BW ≠ s2Probe	Not determinable, because of unequal variances!	#VALUE!	1.83311	Not determinable, because of unequal variances!		1.06153	2	2.91999	Analysis result is not significantly above the blank value!
	PP				1	3	0.69897	1	0	0.30103	2	20	1.38021																			0.793404	0.297846	5.75189	6.54152	s2BW = s2Probe	0.106463	2.91035	1.83311	Analysis result is significantly above the blank value.		-	-	-	-
	PS				1	2	0.60206	1	0	0.30103	0	0	0																			0.30103	0.0906191	One of the variances is 0, i.e. variances differ!	6.54152	s2BW ≠ s2Probe	Not determinable, because of unequal variances!	#VALUE!	1.83311	Not determinable, because of unequal variances!		1.73205	2	2.91999	Analysis result is not significantly above the blank value!
	PVC																															#DIV/0!	#DIV/0!	#DIV/0!	#DIV/0!	#DIV/0!	#DIV/0!	#DIV/0!	1.94318	#DIV/0!		#DIV/0!	#DIV/0!	#DIV/0!	#DIV/0!
	ABS																															#DIV/0!	#DIV/0!	#DIV/0!	#DIV/0!	#DIV/0!	#DIV/0!	#DIV/0!	1.94318	#DIV/0!		#DIV/0!	#DIV/0!	#DIV/0!	#DIV/0!
	PU																															#DIV/0!	#DIV/0!	#DIV/0!	#DIV/0!	#DIV/0!	#DIV/0!	#DIV/0!	1.94318	#DIV/0!		#DIV/0!	#DIV/0!	#DIV/0!	#DIV/0!
	PC																															#DIV/0!	#DIV/0!	#DIV/0!	#DIV/0!	#DIV/0!	#DIV/0!	#DIV/0!	1.94318	#DIV/0!		#DIV/0!	#DIV/0!	#DIV/0!	#DIV/0!
	SAN																															#DIV/0!	#DIV/0!	#DIV/0!	#DIV/0!	#DIV/0!	#DIV/0!	#DIV/0!	1.94318	#DIV/0!		#DIV/0!	#DIV/0!	#DIV/0!	#DIV/0!
	PTFE/PFA																															#DIV/0!	#DIV/0!	#DIV/0!	#DIV/0!	#DIV/0!	#DIV/0!	#DIV/0!	#NUM!	#DIV/0!		#DIV/0!	#DIV/0!	#DIV/0!	#DIV/0!
	(sonstige)				1	0	0.30103	0	0	0	0	0	0																			0.100343	0.0302064	One of the variances is 0, i.e. variances differ!	7.25986	s2BW ≠ s2Probe	Not determinable, because of unequal variances!	#VALUE!	1.85955	Not determinable, because of unequal variances!		1	2	2.91999	Analysis result is not significantly above the blank value!
	(sonstige)																															#DIV/0!	#DIV/0!	#DIV/0!	#DIV/0!	#DIV/0!	#DIV/0!	#DIV/0!	#NUM!	#DIV/0!		#DIV/0!	#DIV/0!	#DIV/0!	#DIV/0!
	(sonstige)																															#DIV/0!	#DIV/0!	#DIV/0!	#DIV/0!	#DIV/0!	#DIV/0!	#DIV/0!	#NUM!	#DIV/0!		#DIV/0!	#DIV/0!	#DIV/0!	#DIV/0!
microplastic fibres	PE																															#DIV/0!	#DIV/0!	#DIV/0!	#DIV/0!	#DIV/0!	#DIV/0!	#DIV/0!	1.94318	#DIV/0!		#DIV/0!	#DIV/0!	#DIV/0!	#DIV/0!
	PET				3	3	0.954243	1	2	0.60206	0	4	0.60206																			0.719454	0.0413442	1.19308	6.54152	s2BW = s2Probe	0.0361402	4.8343	1.83311	Analysis result is significantly above the blank value.		-	-	-	-
	PP																															#DIV/0!	#DIV/0!	#DIV/0!	#DIV/0!	#DIV/0!	#DIV/0!	#DIV/0!	1.94318	#DIV/0!		#DIV/0!	#DIV/0!	#DIV/0!	#DIV/0!
	PS																															#DIV/0!	#DIV/0!	#DIV/0!	#DIV/0!	#DIV/0!	#DIV/0!	#DIV/0!	1.94318	#DIV/0!		#DIV/0!	#DIV/0!	#DIV/0!	#DIV/0!
	PVC																															#DIV/0!	#DIV/0!	#DIV/0!	#DIV/0!	#DIV/0!	#DIV/0!	#DIV/0!	1.94318	#DIV/0!		#DIV/0!	#DIV/0!	#DIV/0!	#DIV/0!
	ABS																															#DIV/0!	#DIV/0!	#DIV/0!	#DIV/0!	#DIV/0!	#DIV/0!	#DIV/0!	1.94318	#DIV/0!		#DIV/0!	#DIV/0!	#DIV/0!	#DIV/0!
	PU																															#DIV/0!	#DIV/0!	#DIV/0!	#DIV/0!	#DIV/0!	#DIV/0!	#DIV/0!	1.94318	#DIV/0!		#DIV/0!	#DIV/0!	#DIV/0!	#DIV/0!
	PC																															#DIV/0!	#DIV/0!	#DIV/0!	#DIV/0!	#DIV/0!	#DIV/0!	#DIV/0!	1.94318	#DIV/0!		#DIV/0!	#DIV/0!	#DIV/0!	#DIV/0!
	SAN																															#DIV/0!	#DIV/0!	#DIV/0!	#DIV/0!	#DIV/0!	#DIV/0!	#DIV/0!	1.94318	#DIV/0!		#DIV/0!	#DIV/0!	#DIV/0!	#DIV/0!
	PTFE/PFA																															#DIV/0!	#DIV/0!	#DIV/0!	#DIV/0!	#DIV/0!	#DIV/0!	#DIV/0!	#NUM!	#DIV/0!		#DIV/0!	#DIV/0!	#DIV/0!	#DIV/0!
	(sonstige)																															#DIV/0!	#DIV/0!	#DIV/0!	#DIV/0!	#DIV/0!	#DIV/0!	#DIV/0!	#NUM!	#DIV/0!		#DIV/0!	#DIV/0!	#DIV/0!	#DIV/0!
	(sonstige)																															#DIV/0!	#DIV/0!	#DIV/0!	#DIV/0!	#DIV/0!	#DIV/0!	#DIV/0!	#NUM!	#DIV/0!		#DIV/0!	#DIV/0!	#DIV/0!	#DIV/0!
	(sonstige)																															#DIV/0!	#DIV/0!	#DIV/0!	#DIV/0!	#DIV/0!	#DIV/0!	#DIV/0!	#NUM!	#DIV/0!		#DIV/0!	#DIV/0!	#DIV/0!	#DIV/0!
pigmented particles	copper phtalocyanine				3	1	0.845098	0	0	0	0	0	0																			0.281699	0.238064	3.13014	6.54152	s2BW = s2Probe	0.112057	0.412819	1.83311	Analysis result is not significantly above the blank value.		-	-	-	-
	blue																															#DIV/0!	#DIV/0!	#DIV/0!	#DIV/0!	#DIV/0!	#DIV/0!	#DIV/0!	1.94318	#DIV/0!		#DIV/0!	#DIV/0!	#DIV/0!	#DIV/0!
	red				33	1	1.82607	0	0	0	1	0	0.30103																			0.709035	0.958488	One of the variances is 0, i.e. variances differ!	6.54152	s2BW ≠ s2Probe	Not determinable, because of unequal variances!	#VALUE!	1.83311	Not determinable, because of unequal variances!		1.2544	2	2.91999	Analysis result is not significantly above the blank value!
	orange																															#DIV/0!	#DIV/0!	#DIV/0!	#DIV/0!	#DIV/0!	#DIV/0!	#DIV/0!	1.94318	#DIV/0!		#DIV/0!	#DIV/0!	#DIV/0!	#DIV/0!
	yellow																															#DIV/0!	#DIV/0!	#DIV/0!	#DIV/0!	#DIV/0!	#DIV/0!	#DIV/0!	1.94318	#DIV/0!		#DIV/0!	#DIV/0!	#DIV/0!	#DIV/0!
	reactive black																															#DIV/0!	#DIV/0!	#DIV/0!	#DIV/0!	#DIV/0!	#DIV/0!	#DIV/0!	1.94318	#DIV/0!		#DIV/0!	#DIV/0!	#DIV/0!	#DIV/0!
	TiO2																															#DIV/0!	#DIV/0!	#DIV/0!	#DIV/0!	#DIV/0!	#DIV/0!	#DIV/0!	1.94318	#DIV/0!		#DIV/0!	#DIV/0!	#DIV/0!	#DIV/0!
	Indigo																															#DIV/0!	#DIV/0!	#DIV/0!	#DIV/0!	#DIV/0!	#DIV/0!	#DIV/0!	1.94318	#DIV/0!		#DIV/0!	#DIV/0!	#DIV/0!	#DIV/0!
	(sonstige)																															#DIV/0!	#DIV/0!	#DIV/0!	#DIV/0!	#DIV/0!	#DIV/0!	#DIV/0!	#NUM!	#DIV/0!		#DIV/0!	#DIV/0!	#DIV/0!	#DIV/0!
	(sonstige)																															#DIV/0!	#DIV/0!	#DIV/0!	#DIV/0!	#DIV/0!	#DIV/0!	#DIV/0!	#NUM!	#DIV/0!		#DIV/0!	#DIV/0!	#DIV/0!	#DIV/0!
	(sonstige)																															#DIV/0!	#DIV/0!	#DIV/0!	#DIV/0!	#DIV/0!	#DIV/0!	#DIV/0!	#NUM!	#DIV/0!		#DIV/0!	#DIV/0!	#DIV/0!	#DIV/0!
pigmented fibres	copper phtalocyanine																															#DIV/0!	#DIV/0!	#DIV/0!	#DIV/0!	#DIV/0!	#DIV/0!	#DIV/0!	1.94318	#DIV/0!		#DIV/0!	#DIV/0!	#DIV/0!	#DIV/0!
	blue																															#DIV/0!	#DIV/0!	#DIV/0!	#DIV/0!	#DIV/0!	#DIV/0!	#DIV/0!	1.94318	#DIV/0!		#DIV/0!	#DIV/0!	#DIV/0!	#DIV/0!
	red																															#DIV/0!	#DIV/0!	#DIV/0!	#DIV/0!	#DIV/0!	#DIV/0!	#DIV/0!	1.94318	#DIV/0!		#DIV/0!	#DIV/0!	#DIV/0!	#DIV/0!
	orange																															#DIV/0!	#DIV/0!	#DIV/0!	#DIV/0!	#DIV/0!	#DIV/0!	#DIV/0!	1.94318	#DIV/0!		#DIV/0!	#DIV/0!	#DIV/0!	#DIV/0!
	yellow																															#DIV/0!	#DIV/0!	#DIV/0!	#DIV/0!	#DIV/0!	#DIV/0!	#DIV/0!	1.94318	#DIV/0!		#DIV/0!	#DIV/0!	#DIV/0!	#DIV/0!
	reactive black																															#DIV/0!	#DIV/0!	#DIV/0!	#DIV/0!	#DIV/0!	#DIV/0!	#DIV/0!	1.94318	#DIV/0!		#DIV/0!	#DIV/0!	#DIV/0!	#DIV/0!
	TiO2																															#DIV/0!	#DIV/0!	#DIV/0!	#DIV/0!	#DIV/0!	#DIV/0!	#DIV/0!	1.94318	#DIV/0!		#DIV/0!	#DIV/0!	#DIV/0!	#DIV/0!
	Indigo																															#DIV/0!	#DIV/0!	#DIV/0!	#DIV/0!	#DIV/0!	#DIV/0!	#DIV/0!	1.94318	#DIV/0!		#DIV/0!	#DIV/0!	#DIV/0!	#DIV/0!
	(sonstige)																															#DIV/0!	#DIV/0!	#DIV/0!	#DIV/0!	#DIV/0!	#DIV/0!	#DIV/0!	#NUM!	#DIV/0!		#DIV/0!	#DIV/0!	#DIV/0!	#DIV/0!
	(sonstige)																															#DIV/0!	#DIV/0!	#DIV/0!	#DIV/0!	#DIV/0!	#DIV/0!	#DIV/0!	#NUM!	#DIV/0!		#DIV/0!	#DIV/0!	#DIV/0!	#DIV/0!
	(sonstige)																															#DIV/0!	#DIV/0!	#DIV/0!	#DIV/0!	#DIV/0!	#DIV/0!	#DIV/0!	#NUM!	#DIV/0!		#DIV/0!	#DIV/0!	#DIV/0!	#DIV/0!

## Sheet: PVC manufacturer SF influent 1
	measured filter area for particles < 100µm:	Basisdaten																																F-Test			t-Test					Welch's-test
	0.5	sample																														Basic statistics
	measured filter area for particle ≥ 100 µm:																																	significance level F-test:	0.05		significance level t-test:	0.05				significance level Welch's-test:		0.05
	1	sample 1 (for single determination (6s-test) only use column 1)			sample 1			sample 2			sample 3			sample 4			sample 5			sample 6			sample 7			sample 8			sample 9			log10 Øsample	log10 s2sample	F	Fα/2	(log10 s2blank = log10 s2sample) ?	s2p	t	tα	(log10 Øsample > log10 Øblank) ?		t	df	tα	(log10 Øsample > log10 Øblank) ?
		< 100 µm	≥ 100 µm	total	< 100 µm	≥ 100 µm	total	< 100 µm	≥ 100 µm	total	< 100 µm	≥ 100 µm	total	< 100 µm	≥ 100 µm	total	< 100 µm	≥ 100 µm	total	< 100 µm	≥ 100 µm	total	< 100 µm	≥ 100 µm	total	< 100 µm	≥ 100 µm	total	< 100 µm	≥ 100 µm	total
microplastic particles	PE																															#DIV/0!	#DIV/0!	#DIV/0!	#DIV/0!	#DIV/0!	#DIV/0!	#DIV/0!	1.94318	#DIV/0!		#DIV/0!	#DIV/0!	#DIV/0!	#DIV/0!
	PET																															#DIV/0!	#DIV/0!	#DIV/0!	#DIV/0!	#DIV/0!	#DIV/0!	#DIV/0!	1.94318	#DIV/0!		#DIV/0!	#DIV/0!	#DIV/0!	#DIV/0!
	PP																															#DIV/0!	#DIV/0!	#DIV/0!	#DIV/0!	#DIV/0!	#DIV/0!	#DIV/0!	1.94318	#DIV/0!		#DIV/0!	#DIV/0!	#DIV/0!	#DIV/0!
	PS																															#DIV/0!	#DIV/0!	#DIV/0!	#DIV/0!	#DIV/0!	#DIV/0!	#DIV/0!	1.94318	#DIV/0!		#DIV/0!	#DIV/0!	#DIV/0!	#DIV/0!
	PVC	235	43	2.71012																												2.71012	#DIV/0!	#DIV/0!	#DIV/0!	#DIV/0!	#DIV/0!	#DIV/0!	1.89458	#DIV/0!		#DIV/0!	#DIV/0!	#DIV/0!	#DIV/0!
	ABS																															#DIV/0!	#DIV/0!	#DIV/0!	#DIV/0!	#DIV/0!	#DIV/0!	#DIV/0!	1.94318	#DIV/0!		#DIV/0!	#DIV/0!	#DIV/0!	#DIV/0!
	PU																															#DIV/0!	#DIV/0!	#DIV/0!	#DIV/0!	#DIV/0!	#DIV/0!	#DIV/0!	1.94318	#DIV/0!		#DIV/0!	#DIV/0!	#DIV/0!	#DIV/0!
	PC																															#DIV/0!	#DIV/0!	#DIV/0!	#DIV/0!	#DIV/0!	#DIV/0!	#DIV/0!	1.94318	#DIV/0!		#DIV/0!	#DIV/0!	#DIV/0!	#DIV/0!
	SAN																															#DIV/0!	#DIV/0!	#DIV/0!	#DIV/0!	#DIV/0!	#DIV/0!	#DIV/0!	1.94318	#DIV/0!		#DIV/0!	#DIV/0!	#DIV/0!	#DIV/0!
	PTFE/PFA																															#DIV/0!	#DIV/0!	#DIV/0!	#DIV/0!	#DIV/0!	#DIV/0!	#DIV/0!	#NUM!	#DIV/0!		#DIV/0!	#DIV/0!	#DIV/0!	#DIV/0!
	(sonstige)																															#DIV/0!	#DIV/0!	#DIV/0!	#DIV/0!	#DIV/0!	#DIV/0!	#DIV/0!	2.01505	#DIV/0!		#DIV/0!	#DIV/0!	#DIV/0!	#DIV/0!
	(sonstige)																															#DIV/0!	#DIV/0!	#DIV/0!	#DIV/0!	#DIV/0!	#DIV/0!	#DIV/0!	#NUM!	#DIV/0!		#DIV/0!	#DIV/0!	#DIV/0!	#DIV/0!
	(sonstige)																															#DIV/0!	#DIV/0!	#DIV/0!	#DIV/0!	#DIV/0!	#DIV/0!	#DIV/0!	#NUM!	#DIV/0!		#DIV/0!	#DIV/0!	#DIV/0!	#DIV/0!
microplastic fibres	PE																															#DIV/0!	#DIV/0!	#DIV/0!	#DIV/0!	#DIV/0!	#DIV/0!	#DIV/0!	1.94318	#DIV/0!		#DIV/0!	#DIV/0!	#DIV/0!	#DIV/0!
	PET																															#DIV/0!	#DIV/0!	#DIV/0!	#DIV/0!	#DIV/0!	#DIV/0!	#DIV/0!	1.94318	#DIV/0!		#DIV/0!	#DIV/0!	#DIV/0!	#DIV/0!
	PP																															#DIV/0!	#DIV/0!	#DIV/0!	#DIV/0!	#DIV/0!	#DIV/0!	#DIV/0!	1.94318	#DIV/0!		#DIV/0!	#DIV/0!	#DIV/0!	#DIV/0!
	PS																															#DIV/0!	#DIV/0!	#DIV/0!	#DIV/0!	#DIV/0!	#DIV/0!	#DIV/0!	1.94318	#DIV/0!		#DIV/0!	#DIV/0!	#DIV/0!	#DIV/0!
	PVC																															#DIV/0!	#DIV/0!	#DIV/0!	#DIV/0!	#DIV/0!	#DIV/0!	#DIV/0!	1.94318	#DIV/0!		#DIV/0!	#DIV/0!	#DIV/0!	#DIV/0!
	ABS																															#DIV/0!	#DIV/0!	#DIV/0!	#DIV/0!	#DIV/0!	#DIV/0!	#DIV/0!	1.94318	#DIV/0!		#DIV/0!	#DIV/0!	#DIV/0!	#DIV/0!
	PU																															#DIV/0!	#DIV/0!	#DIV/0!	#DIV/0!	#DIV/0!	#DIV/0!	#DIV/0!	1.94318	#DIV/0!		#DIV/0!	#DIV/0!	#DIV/0!	#DIV/0!
	PC																															#DIV/0!	#DIV/0!	#DIV/0!	#DIV/0!	#DIV/0!	#DIV/0!	#DIV/0!	1.94318	#DIV/0!		#DIV/0!	#DIV/0!	#DIV/0!	#DIV/0!
	SAN																															#DIV/0!	#DIV/0!	#DIV/0!	#DIV/0!	#DIV/0!	#DIV/0!	#DIV/0!	1.94318	#DIV/0!		#DIV/0!	#DIV/0!	#DIV/0!	#DIV/0!
	PTFE/PFA																															#DIV/0!	#DIV/0!	#DIV/0!	#DIV/0!	#DIV/0!	#DIV/0!	#DIV/0!	#NUM!	#DIV/0!		#DIV/0!	#DIV/0!	#DIV/0!	#DIV/0!
	(sonstige)																															#DIV/0!	#DIV/0!	#DIV/0!	#DIV/0!	#DIV/0!	#DIV/0!	#DIV/0!	#NUM!	#DIV/0!		#DIV/0!	#DIV/0!	#DIV/0!	#DIV/0!
	(sonstige)																															#DIV/0!	#DIV/0!	#DIV/0!	#DIV/0!	#DIV/0!	#DIV/0!	#DIV/0!	#NUM!	#DIV/0!		#DIV/0!	#DIV/0!	#DIV/0!	#DIV/0!
	(sonstige)																															#DIV/0!	#DIV/0!	#DIV/0!	#DIV/0!	#DIV/0!	#DIV/0!	#DIV/0!	#NUM!	#DIV/0!		#DIV/0!	#DIV/0!	#DIV/0!	#DIV/0!
pigmented particles	copper phtalocyanine																															#DIV/0!	#DIV/0!	#DIV/0!	#DIV/0!	#DIV/0!	#DIV/0!	#DIV/0!	1.94318	#DIV/0!		#DIV/0!	#DIV/0!	#DIV/0!	#DIV/0!
	blue																															#DIV/0!	#DIV/0!	#DIV/0!	#DIV/0!	#DIV/0!	#DIV/0!	#DIV/0!	1.94318	#DIV/0!		#DIV/0!	#DIV/0!	#DIV/0!	#DIV/0!
	red																															#DIV/0!	#DIV/0!	#DIV/0!	#DIV/0!	#DIV/0!	#DIV/0!	#DIV/0!	1.94318	#DIV/0!		#DIV/0!	#DIV/0!	#DIV/0!	#DIV/0!
	orange																															#DIV/0!	#DIV/0!	#DIV/0!	#DIV/0!	#DIV/0!	#DIV/0!	#DIV/0!	1.94318	#DIV/0!		#DIV/0!	#DIV/0!	#DIV/0!	#DIV/0!
	yellow																															#DIV/0!	#DIV/0!	#DIV/0!	#DIV/0!	#DIV/0!	#DIV/0!	#DIV/0!	1.94318	#DIV/0!		#DIV/0!	#DIV/0!	#DIV/0!	#DIV/0!
	reactive black																															#DIV/0!	#DIV/0!	#DIV/0!	#DIV/0!	#DIV/0!	#DIV/0!	#DIV/0!	1.94318	#DIV/0!		#DIV/0!	#DIV/0!	#DIV/0!	#DIV/0!
	TiO2																															#DIV/0!	#DIV/0!	#DIV/0!	#DIV/0!	#DIV/0!	#DIV/0!	#DIV/0!	1.94318	#DIV/0!		#DIV/0!	#DIV/0!	#DIV/0!	#DIV/0!
	Indigo																															#DIV/0!	#DIV/0!	#DIV/0!	#DIV/0!	#DIV/0!	#DIV/0!	#DIV/0!	1.94318	#DIV/0!		#DIV/0!	#DIV/0!	#DIV/0!	#DIV/0!
	(sonstige)																															#DIV/0!	#DIV/0!	#DIV/0!	#DIV/0!	#DIV/0!	#DIV/0!	#DIV/0!	#NUM!	#DIV/0!		#DIV/0!	#DIV/0!	#DIV/0!	#DIV/0!
	(sonstige)																															#DIV/0!	#DIV/0!	#DIV/0!	#DIV/0!	#DIV/0!	#DIV/0!	#DIV/0!	#NUM!	#DIV/0!		#DIV/0!	#DIV/0!	#DIV/0!	#DIV/0!
	(sonstige)																															#DIV/0!	#DIV/0!	#DIV/0!	#DIV/0!	#DIV/0!	#DIV/0!	#DIV/0!	#NUM!	#DIV/0!		#DIV/0!	#DIV/0!	#DIV/0!	#DIV/0!
pigmented fibres	copper phtalocyanine																															#DIV/0!	#DIV/0!	#DIV/0!	#DIV/0!	#DIV/0!	#DIV/0!	#DIV/0!	1.94318	#DIV/0!		#DIV/0!	#DIV/0!	#DIV/0!	#DIV/0!
	blue																															#DIV/0!	#DIV/0!	#DIV/0!	#DIV/0!	#DIV/0!	#DIV/0!	#DIV/0!	1.94318	#DIV/0!		#DIV/0!	#DIV/0!	#DIV/0!	#DIV/0!
	red																															#DIV/0!	#DIV/0!	#DIV/0!	#DIV/0!	#DIV/0!	#DIV/0!	#DIV/0!	1.94318	#DIV/0!		#DIV/0!	#DIV/0!	#DIV/0!	#DIV/0!
	orange																															#DIV/0!	#DIV/0!	#DIV/0!	#DIV/0!	#DIV/0!	#DIV/0!	#DIV/0!	1.94318	#DIV/0!		#DIV/0!	#DIV/0!	#DIV/0!	#DIV/0!
	yellow																															#DIV/0!	#DIV/0!	#DIV/0!	#DIV/0!	#DIV/0!	#DIV/0!	#DIV/0!	1.94318	#DIV/0!		#DIV/0!	#DIV/0!	#DIV/0!	#DIV/0!
	reactive black																															#DIV/0!	#DIV/0!	#DIV/0!	#DIV/0!	#DIV/0!	#DIV/0!	#DIV/0!	1.94318	#DIV/0!		#DIV/0!	#DIV/0!	#DIV/0!	#DIV/0!
	TiO2																															#DIV/0!	#DIV/0!	#DIV/0!	#DIV/0!	#DIV/0!	#DIV/0!	#DIV/0!	1.94318	#DIV/0!		#DIV/0!	#DIV/0!	#DIV/0!	#DIV/0!
	Indigo																															#DIV/0!	#DIV/0!	#DIV/0!	#DIV/0!	#DIV/0!	#DIV/0!	#DIV/0!	1.94318	#DIV/0!		#DIV/0!	#DIV/0!	#DIV/0!	#DIV/0!
	(sonstige)																															#DIV/0!	#DIV/0!	#DIV/0!	#DIV/0!	#DIV/0!	#DIV/0!	#DIV/0!	#NUM!	#DIV/0!		#DIV/0!	#DIV/0!	#DIV/0!	#DIV/0!
	(sonstige)																															#DIV/0!	#DIV/0!	#DIV/0!	#DIV/0!	#DIV/0!	#DIV/0!	#DIV/0!	#NUM!	#DIV/0!		#DIV/0!	#DIV/0!	#DIV/0!	#DIV/0!
	(sonstige)																															#DIV/0!	#DIV/0!	#DIV/0!	#DIV/0!	#DIV/0!	#DIV/0!	#DIV/0!	#NUM!	#DIV/0!		#DIV/0!	#DIV/0!	#DIV/0!	#DIV/0!

## Sheet: PVC manufacturer SF influent 2
	measured filter area for particles < 100µm:	Basisdaten																																F-Test			t-Test					Welch's-test
	0.5	sample																														Basic statistics
	measured filter area for particle ≥ 100 µm:																																	significance level F-test:	0.05		significance level t-test:	0.05				significance level Welch's-test:		0.05
	1	sample 1 (for single determination (6s-test) only use column 1)			sample 1			sample 2			sample 3			sample 4			sample 5			sample 6			sample 7			sample 8			sample 9			log10 Øsample	log10 s2sample	F	Fα/2	(log10 s2blank = log10 s2sample) ?	s2p	t	tα	(log10 Øsample > log10 Øblank) ?		t	df	tα	(log10 Øsample > log10 Øblank) ?
		< 100 µm	≥ 100 µm	total	< 100 µm	≥ 100 µm	total	< 100 µm	≥ 100 µm	total	< 100 µm	≥ 100 µm	total	< 100 µm	≥ 100 µm	total	< 100 µm	≥ 100 µm	total	< 100 µm	≥ 100 µm	total	< 100 µm	≥ 100 µm	total	< 100 µm	≥ 100 µm	total	< 100 µm	≥ 100 µm	total
microplastic particles	PE																															#DIV/0!	#DIV/0!	#DIV/0!	#DIV/0!	#DIV/0!	#DIV/0!	#DIV/0!	1.94318	#DIV/0!		#DIV/0!	#DIV/0!	#DIV/0!	#DIV/0!
	PET																															#DIV/0!	#DIV/0!	#DIV/0!	#DIV/0!	#DIV/0!	#DIV/0!	#DIV/0!	1.94318	#DIV/0!		#DIV/0!	#DIV/0!	#DIV/0!	#DIV/0!
	PP																															#DIV/0!	#DIV/0!	#DIV/0!	#DIV/0!	#DIV/0!	#DIV/0!	#DIV/0!	1.94318	#DIV/0!		#DIV/0!	#DIV/0!	#DIV/0!	#DIV/0!
	PS																															#DIV/0!	#DIV/0!	#DIV/0!	#DIV/0!	#DIV/0!	#DIV/0!	#DIV/0!	1.94318	#DIV/0!		#DIV/0!	#DIV/0!	#DIV/0!	#DIV/0!
	PVC	1178	56	3.38238																												3.38238	#DIV/0!	#DIV/0!	#DIV/0!	#DIV/0!	#DIV/0!	#DIV/0!	1.89458	#DIV/0!		#DIV/0!	#DIV/0!	#DIV/0!	#DIV/0!
	ABS																															#DIV/0!	#DIV/0!	#DIV/0!	#DIV/0!	#DIV/0!	#DIV/0!	#DIV/0!	1.94318	#DIV/0!		#DIV/0!	#DIV/0!	#DIV/0!	#DIV/0!
	PU																															#DIV/0!	#DIV/0!	#DIV/0!	#DIV/0!	#DIV/0!	#DIV/0!	#DIV/0!	1.94318	#DIV/0!		#DIV/0!	#DIV/0!	#DIV/0!	#DIV/0!
	PC																															#DIV/0!	#DIV/0!	#DIV/0!	#DIV/0!	#DIV/0!	#DIV/0!	#DIV/0!	1.94318	#DIV/0!		#DIV/0!	#DIV/0!	#DIV/0!	#DIV/0!
	SAN																															#DIV/0!	#DIV/0!	#DIV/0!	#DIV/0!	#DIV/0!	#DIV/0!	#DIV/0!	1.94318	#DIV/0!		#DIV/0!	#DIV/0!	#DIV/0!	#DIV/0!
	PTFE/PFA																															#DIV/0!	#DIV/0!	#DIV/0!	#DIV/0!	#DIV/0!	#DIV/0!	#DIV/0!	#NUM!	#DIV/0!		#DIV/0!	#DIV/0!	#DIV/0!	#DIV/0!
	(sonstige)																															#DIV/0!	#DIV/0!	#DIV/0!	#DIV/0!	#DIV/0!	#DIV/0!	#DIV/0!	2.01505	#DIV/0!		#DIV/0!	#DIV/0!	#DIV/0!	#DIV/0!
	(sonstige)																															#DIV/0!	#DIV/0!	#DIV/0!	#DIV/0!	#DIV/0!	#DIV/0!	#DIV/0!	#NUM!	#DIV/0!		#DIV/0!	#DIV/0!	#DIV/0!	#DIV/0!
	(sonstige)																															#DIV/0!	#DIV/0!	#DIV/0!	#DIV/0!	#DIV/0!	#DIV/0!	#DIV/0!	#NUM!	#DIV/0!		#DIV/0!	#DIV/0!	#DIV/0!	#DIV/0!
microplastic fibres	PE																															#DIV/0!	#DIV/0!	#DIV/0!	#DIV/0!	#DIV/0!	#DIV/0!	#DIV/0!	1.94318	#DIV/0!		#DIV/0!	#DIV/0!	#DIV/0!	#DIV/0!
	PET																															#DIV/0!	#DIV/0!	#DIV/0!	#DIV/0!	#DIV/0!	#DIV/0!	#DIV/0!	1.94318	#DIV/0!		#DIV/0!	#DIV/0!	#DIV/0!	#DIV/0!
	PP																															#DIV/0!	#DIV/0!	#DIV/0!	#DIV/0!	#DIV/0!	#DIV/0!	#DIV/0!	1.94318	#DIV/0!		#DIV/0!	#DIV/0!	#DIV/0!	#DIV/0!
	PS																															#DIV/0!	#DIV/0!	#DIV/0!	#DIV/0!	#DIV/0!	#DIV/0!	#DIV/0!	1.94318	#DIV/0!		#DIV/0!	#DIV/0!	#DIV/0!	#DIV/0!
	PVC																															#DIV/0!	#DIV/0!	#DIV/0!	#DIV/0!	#DIV/0!	#DIV/0!	#DIV/0!	1.94318	#DIV/0!		#DIV/0!	#DIV/0!	#DIV/0!	#DIV/0!
	ABS																															#DIV/0!	#DIV/0!	#DIV/0!	#DIV/0!	#DIV/0!	#DIV/0!	#DIV/0!	1.94318	#DIV/0!		#DIV/0!	#DIV/0!	#DIV/0!	#DIV/0!
	PU																															#DIV/0!	#DIV/0!	#DIV/0!	#DIV/0!	#DIV/0!	#DIV/0!	#DIV/0!	1.94318	#DIV/0!		#DIV/0!	#DIV/0!	#DIV/0!	#DIV/0!
	PC																															#DIV/0!	#DIV/0!	#DIV/0!	#DIV/0!	#DIV/0!	#DIV/0!	#DIV/0!	1.94318	#DIV/0!		#DIV/0!	#DIV/0!	#DIV/0!	#DIV/0!
	SAN																															#DIV/0!	#DIV/0!	#DIV/0!	#DIV/0!	#DIV/0!	#DIV/0!	#DIV/0!	1.94318	#DIV/0!		#DIV/0!	#DIV/0!	#DIV/0!	#DIV/0!
	PTFE/PFA																															#DIV/0!	#DIV/0!	#DIV/0!	#DIV/0!	#DIV/0!	#DIV/0!	#DIV/0!	#NUM!	#DIV/0!		#DIV/0!	#DIV/0!	#DIV/0!	#DIV/0!
	(sonstige)																															#DIV/0!	#DIV/0!	#DIV/0!	#DIV/0!	#DIV/0!	#DIV/0!	#DIV/0!	#NUM!	#DIV/0!		#DIV/0!	#DIV/0!	#DIV/0!	#DIV/0!
	(sonstige)																															#DIV/0!	#DIV/0!	#DIV/0!	#DIV/0!	#DIV/0!	#DIV/0!	#DIV/0!	#NUM!	#DIV/0!		#DIV/0!	#DIV/0!	#DIV/0!	#DIV/0!
	(sonstige)																															#DIV/0!	#DIV/0!	#DIV/0!	#DIV/0!	#DIV/0!	#DIV/0!	#DIV/0!	#NUM!	#DIV/0!		#DIV/0!	#DIV/0!	#DIV/0!	#DIV/0!
pigmented particles	copper phtalocyanine																															#DIV/0!	#DIV/0!	#DIV/0!	#DIV/0!	#DIV/0!	#DIV/0!	#DIV/0!	1.94318	#DIV/0!		#DIV/0!	#DIV/0!	#DIV/0!	#DIV/0!
	blue																															#DIV/0!	#DIV/0!	#DIV/0!	#DIV/0!	#DIV/0!	#DIV/0!	#DIV/0!	1.94318	#DIV/0!		#DIV/0!	#DIV/0!	#DIV/0!	#DIV/0!
	red																															#DIV/0!	#DIV/0!	#DIV/0!	#DIV/0!	#DIV/0!	#DIV/0!	#DIV/0!	1.94318	#DIV/0!		#DIV/0!	#DIV/0!	#DIV/0!	#DIV/0!
	orange																															#DIV/0!	#DIV/0!	#DIV/0!	#DIV/0!	#DIV/0!	#DIV/0!	#DIV/0!	1.94318	#DIV/0!		#DIV/0!	#DIV/0!	#DIV/0!	#DIV/0!
	yellow																															#DIV/0!	#DIV/0!	#DIV/0!	#DIV/0!	#DIV/0!	#DIV/0!	#DIV/0!	1.94318	#DIV/0!		#DIV/0!	#DIV/0!	#DIV/0!	#DIV/0!
	reactive black																															#DIV/0!	#DIV/0!	#DIV/0!	#DIV/0!	#DIV/0!	#DIV/0!	#DIV/0!	1.94318	#DIV/0!		#DIV/0!	#DIV/0!	#DIV/0!	#DIV/0!
	TiO2																															#DIV/0!	#DIV/0!	#DIV/0!	#DIV/0!	#DIV/0!	#DIV/0!	#DIV/0!	1.94318	#DIV/0!		#DIV/0!	#DIV/0!	#DIV/0!	#DIV/0!
	Indigo																															#DIV/0!	#DIV/0!	#DIV/0!	#DIV/0!	#DIV/0!	#DIV/0!	#DIV/0!	1.94318	#DIV/0!		#DIV/0!	#DIV/0!	#DIV/0!	#DIV/0!
	(sonstige)																															#DIV/0!	#DIV/0!	#DIV/0!	#DIV/0!	#DIV/0!	#DIV/0!	#DIV/0!	#NUM!	#DIV/0!		#DIV/0!	#DIV/0!	#DIV/0!	#DIV/0!
	(sonstige)																															#DIV/0!	#DIV/0!	#DIV/0!	#DIV/0!	#DIV/0!	#DIV/0!	#DIV/0!	#NUM!	#DIV/0!		#DIV/0!	#DIV/0!	#DIV/0!	#DIV/0!
	(sonstige)																															#DIV/0!	#DIV/0!	#DIV/0!	#DIV/0!	#DIV/0!	#DIV/0!	#DIV/0!	#NUM!	#DIV/0!		#DIV/0!	#DIV/0!	#DIV/0!	#DIV/0!
pigmented fibres	copper phtalocyanine																															#DIV/0!	#DIV/0!	#DIV/0!	#DIV/0!	#DIV/0!	#DIV/0!	#DIV/0!	1.94318	#DIV/0!		#DIV/0!	#DIV/0!	#DIV/0!	#DIV/0!
	blue																															#DIV/0!	#DIV/0!	#DIV/0!	#DIV/0!	#DIV/0!	#DIV/0!	#DIV/0!	1.94318	#DIV/0!		#DIV/0!	#DIV/0!	#DIV/0!	#DIV/0!
	red																															#DIV/0!	#DIV/0!	#DIV/0!	#DIV/0!	#DIV/0!	#DIV/0!	#DIV/0!	1.94318	#DIV/0!		#DIV/0!	#DIV/0!	#DIV/0!	#DIV/0!
	orange																															#DIV/0!	#DIV/0!	#DIV/0!	#DIV/0!	#DIV/0!	#DIV/0!	#DIV/0!	1.94318	#DIV/0!		#DIV/0!	#DIV/0!	#DIV/0!	#DIV/0!
	yellow																															#DIV/0!	#DIV/0!	#DIV/0!	#DIV/0!	#DIV/0!	#DIV/0!	#DIV/0!	1.94318	#DIV/0!		#DIV/0!	#DIV/0!	#DIV/0!	#DIV/0!
	reactive black																															#DIV/0!	#DIV/0!	#DIV/0!	#DIV/0!	#DIV/0!	#DIV/0!	#DIV/0!	1.94318	#DIV/0!		#DIV/0!	#DIV/0!	#DIV/0!	#DIV/0!
	TiO2																															#DIV/0!	#DIV/0!	#DIV/0!	#DIV/0!	#DIV/0!	#DIV/0!	#DIV/0!	1.94318	#DIV/0!		#DIV/0!	#DIV/0!	#DIV/0!	#DIV/0!
	Indigo																															#DIV/0!	#DIV/0!	#DIV/0!	#DIV/0!	#DIV/0!	#DIV/0!	#DIV/0!	1.94318	#DIV/0!		#DIV/0!	#DIV/0!	#DIV/0!	#DIV/0!
	(sonstige)																															#DIV/0!	#DIV/0!	#DIV/0!	#DIV/0!	#DIV/0!	#DIV/0!	#DIV/0!	#NUM!	#DIV/0!		#DIV/0!	#DIV/0!	#DIV/0!	#DIV/0!
	(sonstige)																															#DIV/0!	#DIV/0!	#DIV/0!	#DIV/0!	#DIV/0!	#DIV/0!	#DIV/0!	#NUM!	#DIV/0!		#DIV/0!	#DIV/0!	#DIV/0!	#DIV/0!
	(sonstige)																															#DIV/0!	#DIV/0!	#DIV/0!	#DIV/0!	#DIV/0!	#DIV/0!	#DIV/0!	#NUM!	#DIV/0!		#DIV/0!	#DIV/0!	#DIV/0!	#DIV/0!

## Sheet: PVC manufacturer SF influent 3
	measured filter area for particles < 100µm:	Basisdaten																																F-Test			t-Test					Welch's-test
	0.5	sample																														Basic statistics
	measured filter area for particle ≥ 100 µm:																																	significance level F-test:	0.05		significance level t-test:	0.05				significance level Welch's-test:		0.05
	1	sample 1 (for single determination (6s-test) only use column 1)			sample 1			sample 2			sample 3			sample 4			sample 5			sample 6			sample 7			sample 8			sample 9			log10 Øsample	log10 s2sample	F	Fα/2	(log10 s2blank = log10 s2sample) ?	s2p	t	tα	(log10 Øsample > log10 Øblank) ?		t	df	tα	(log10 Øsample > log10 Øblank) ?
		< 100 µm	≥ 100 µm	total	< 100 µm	≥ 100 µm	total	< 100 µm	≥ 100 µm	total	< 100 µm	≥ 100 µm	total	< 100 µm	≥ 100 µm	total	< 100 µm	≥ 100 µm	total	< 100 µm	≥ 100 µm	total	< 100 µm	≥ 100 µm	total	< 100 µm	≥ 100 µm	total	< 100 µm	≥ 100 µm	total
microplastic particles	PE																															#DIV/0!	#DIV/0!	#DIV/0!	#DIV/0!	#DIV/0!	#DIV/0!	#DIV/0!	1.94318	#DIV/0!		#DIV/0!	#DIV/0!	#DIV/0!	#DIV/0!
	PET																															#DIV/0!	#DIV/0!	#DIV/0!	#DIV/0!	#DIV/0!	#DIV/0!	#DIV/0!	1.94318	#DIV/0!		#DIV/0!	#DIV/0!	#DIV/0!	#DIV/0!
	PP																															#DIV/0!	#DIV/0!	#DIV/0!	#DIV/0!	#DIV/0!	#DIV/0!	#DIV/0!	1.94318	#DIV/0!		#DIV/0!	#DIV/0!	#DIV/0!	#DIV/0!
	PS																															#DIV/0!	#DIV/0!	#DIV/0!	#DIV/0!	#DIV/0!	#DIV/0!	#DIV/0!	1.94318	#DIV/0!		#DIV/0!	#DIV/0!	#DIV/0!	#DIV/0!
	PVC	3538	78	3.85455																												3.85455	#DIV/0!	#DIV/0!	#DIV/0!	#DIV/0!	#DIV/0!	#DIV/0!	1.89458	#DIV/0!		#DIV/0!	#DIV/0!	#DIV/0!	#DIV/0!
	ABS																															#DIV/0!	#DIV/0!	#DIV/0!	#DIV/0!	#DIV/0!	#DIV/0!	#DIV/0!	1.94318	#DIV/0!		#DIV/0!	#DIV/0!	#DIV/0!	#DIV/0!
	PU																															#DIV/0!	#DIV/0!	#DIV/0!	#DIV/0!	#DIV/0!	#DIV/0!	#DIV/0!	1.94318	#DIV/0!		#DIV/0!	#DIV/0!	#DIV/0!	#DIV/0!
	PC																															#DIV/0!	#DIV/0!	#DIV/0!	#DIV/0!	#DIV/0!	#DIV/0!	#DIV/0!	1.94318	#DIV/0!		#DIV/0!	#DIV/0!	#DIV/0!	#DIV/0!
	SAN																															#DIV/0!	#DIV/0!	#DIV/0!	#DIV/0!	#DIV/0!	#DIV/0!	#DIV/0!	1.94318	#DIV/0!		#DIV/0!	#DIV/0!	#DIV/0!	#DIV/0!
	PTFE/PFA																															#DIV/0!	#DIV/0!	#DIV/0!	#DIV/0!	#DIV/0!	#DIV/0!	#DIV/0!	#NUM!	#DIV/0!		#DIV/0!	#DIV/0!	#DIV/0!	#DIV/0!
	(sonstige)																															#DIV/0!	#DIV/0!	#DIV/0!	#DIV/0!	#DIV/0!	#DIV/0!	#DIV/0!	2.01505	#DIV/0!		#DIV/0!	#DIV/0!	#DIV/0!	#DIV/0!
	(sonstige)																															#DIV/0!	#DIV/0!	#DIV/0!	#DIV/0!	#DIV/0!	#DIV/0!	#DIV/0!	#NUM!	#DIV/0!		#DIV/0!	#DIV/0!	#DIV/0!	#DIV/0!
	(sonstige)																															#DIV/0!	#DIV/0!	#DIV/0!	#DIV/0!	#DIV/0!	#DIV/0!	#DIV/0!	#NUM!	#DIV/0!		#DIV/0!	#DIV/0!	#DIV/0!	#DIV/0!
microplastic fibres	PE																															#DIV/0!	#DIV/0!	#DIV/0!	#DIV/0!	#DIV/0!	#DIV/0!	#DIV/0!	1.94318	#DIV/0!		#DIV/0!	#DIV/0!	#DIV/0!	#DIV/0!
	PET																															#DIV/0!	#DIV/0!	#DIV/0!	#DIV/0!	#DIV/0!	#DIV/0!	#DIV/0!	1.94318	#DIV/0!		#DIV/0!	#DIV/0!	#DIV/0!	#DIV/0!
	PP																															#DIV/0!	#DIV/0!	#DIV/0!	#DIV/0!	#DIV/0!	#DIV/0!	#DIV/0!	1.94318	#DIV/0!		#DIV/0!	#DIV/0!	#DIV/0!	#DIV/0!
	PS																															#DIV/0!	#DIV/0!	#DIV/0!	#DIV/0!	#DIV/0!	#DIV/0!	#DIV/0!	1.94318	#DIV/0!		#DIV/0!	#DIV/0!	#DIV/0!	#DIV/0!
	PVC																															#DIV/0!	#DIV/0!	#DIV/0!	#DIV/0!	#DIV/0!	#DIV/0!	#DIV/0!	1.94318	#DIV/0!		#DIV/0!	#DIV/0!	#DIV/0!	#DIV/0!
	ABS																															#DIV/0!	#DIV/0!	#DIV/0!	#DIV/0!	#DIV/0!	#DIV/0!	#DIV/0!	1.94318	#DIV/0!		#DIV/0!	#DIV/0!	#DIV/0!	#DIV/0!
	PU																															#DIV/0!	#DIV/0!	#DIV/0!	#DIV/0!	#DIV/0!	#DIV/0!	#DIV/0!	1.94318	#DIV/0!		#DIV/0!	#DIV/0!	#DIV/0!	#DIV/0!
	PC																															#DIV/0!	#DIV/0!	#DIV/0!	#DIV/0!	#DIV/0!	#DIV/0!	#DIV/0!	1.94318	#DIV/0!		#DIV/0!	#DIV/0!	#DIV/0!	#DIV/0!
	SAN																															#DIV/0!	#DIV/0!	#DIV/0!	#DIV/0!	#DIV/0!	#DIV/0!	#DIV/0!	1.94318	#DIV/0!		#DIV/0!	#DIV/0!	#DIV/0!	#DIV/0!
	PTFE/PFA																															#DIV/0!	#DIV/0!	#DIV/0!	#DIV/0!	#DIV/0!	#DIV/0!	#DIV/0!	#NUM!	#DIV/0!		#DIV/0!	#DIV/0!	#DIV/0!	#DIV/0!
	(sonstige)																															#DIV/0!	#DIV/0!	#DIV/0!	#DIV/0!	#DIV/0!	#DIV/0!	#DIV/0!	#NUM!	#DIV/0!		#DIV/0!	#DIV/0!	#DIV/0!	#DIV/0!
	(sonstige)																															#DIV/0!	#DIV/0!	#DIV/0!	#DIV/0!	#DIV/0!	#DIV/0!	#DIV/0!	#NUM!	#DIV/0!		#DIV/0!	#DIV/0!	#DIV/0!	#DIV/0!
	(sonstige)																															#DIV/0!	#DIV/0!	#DIV/0!	#DIV/0!	#DIV/0!	#DIV/0!	#DIV/0!	#NUM!	#DIV/0!		#DIV/0!	#DIV/0!	#DIV/0!	#DIV/0!
pigmented particles	copper phtalocyanine																															#DIV/0!	#DIV/0!	#DIV/0!	#DIV/0!	#DIV/0!	#DIV/0!	#DIV/0!	1.94318	#DIV/0!		#DIV/0!	#DIV/0!	#DIV/0!	#DIV/0!
	blue																															#DIV/0!	#DIV/0!	#DIV/0!	#DIV/0!	#DIV/0!	#DIV/0!	#DIV/0!	1.94318	#DIV/0!		#DIV/0!	#DIV/0!	#DIV/0!	#DIV/0!
	red																															#DIV/0!	#DIV/0!	#DIV/0!	#DIV/0!	#DIV/0!	#DIV/0!	#DIV/0!	1.94318	#DIV/0!		#DIV/0!	#DIV/0!	#DIV/0!	#DIV/0!
	orange																															#DIV/0!	#DIV/0!	#DIV/0!	#DIV/0!	#DIV/0!	#DIV/0!	#DIV/0!	1.94318	#DIV/0!		#DIV/0!	#DIV/0!	#DIV/0!	#DIV/0!
	yellow																															#DIV/0!	#DIV/0!	#DIV/0!	#DIV/0!	#DIV/0!	#DIV/0!	#DIV/0!	1.94318	#DIV/0!		#DIV/0!	#DIV/0!	#DIV/0!	#DIV/0!
	reactive black																															#DIV/0!	#DIV/0!	#DIV/0!	#DIV/0!	#DIV/0!	#DIV/0!	#DIV/0!	1.94318	#DIV/0!		#DIV/0!	#DIV/0!	#DIV/0!	#DIV/0!
	TiO2																															#DIV/0!	#DIV/0!	#DIV/0!	#DIV/0!	#DIV/0!	#DIV/0!	#DIV/0!	1.94318	#DIV/0!		#DIV/0!	#DIV/0!	#DIV/0!	#DIV/0!
	Indigo																															#DIV/0!	#DIV/0!	#DIV/0!	#DIV/0!	#DIV/0!	#DIV/0!	#DIV/0!	1.94318	#DIV/0!		#DIV/0!	#DIV/0!	#DIV/0!	#DIV/0!
	(sonstige)																															#DIV/0!	#DIV/0!	#DIV/0!	#DIV/0!	#DIV/0!	#DIV/0!	#DIV/0!	#NUM!	#DIV/0!		#DIV/0!	#DIV/0!	#DIV/0!	#DIV/0!
	(sonstige)																															#DIV/0!	#DIV/0!	#DIV/0!	#DIV/0!	#DIV/0!	#DIV/0!	#DIV/0!	#NUM!	#DIV/0!		#DIV/0!	#DIV/0!	#DIV/0!	#DIV/0!
	(sonstige)																															#DIV/0!	#DIV/0!	#DIV/0!	#DIV/0!	#DIV/0!	#DIV/0!	#DIV/0!	#NUM!	#DIV/0!		#DIV/0!	#DIV/0!	#DIV/0!	#DIV/0!
pigmented fibres	copper phtalocyanine																															#DIV/0!	#DIV/0!	#DIV/0!	#DIV/0!	#DIV/0!	#DIV/0!	#DIV/0!	1.94318	#DIV/0!		#DIV/0!	#DIV/0!	#DIV/0!	#DIV/0!
	blue																															#DIV/0!	#DIV/0!	#DIV/0!	#DIV/0!	#DIV/0!	#DIV/0!	#DIV/0!	1.94318	#DIV/0!		#DIV/0!	#DIV/0!	#DIV/0!	#DIV/0!
	red																															#DIV/0!	#DIV/0!	#DIV/0!	#DIV/0!	#DIV/0!	#DIV/0!	#DIV/0!	1.94318	#DIV/0!		#DIV/0!	#DIV/0!	#DIV/0!	#DIV/0!
	orange																															#DIV/0!	#DIV/0!	#DIV/0!	#DIV/0!	#DIV/0!	#DIV/0!	#DIV/0!	1.94318	#DIV/0!		#DIV/0!	#DIV/0!	#DIV/0!	#DIV/0!
	yellow																															#DIV/0!	#DIV/0!	#DIV/0!	#DIV/0!	#DIV/0!	#DIV/0!	#DIV/0!	1.94318	#DIV/0!		#DIV/0!	#DIV/0!	#DIV/0!	#DIV/0!
	reactive black																															#DIV/0!	#DIV/0!	#DIV/0!	#DIV/0!	#DIV/0!	#DIV/0!	#DIV/0!	1.94318	#DIV/0!		#DIV/0!	#DIV/0!	#DIV/0!	#DIV/0!
	TiO2																															#DIV/0!	#DIV/0!	#DIV/0!	#DIV/0!	#DIV/0!	#DIV/0!	#DIV/0!	1.94318	#DIV/0!		#DIV/0!	#DIV/0!	#DIV/0!	#DIV/0!
	Indigo																															#DIV/0!	#DIV/0!	#DIV/0!	#DIV/0!	#DIV/0!	#DIV/0!	#DIV/0!	1.94318	#DIV/0!		#DIV/0!	#DIV/0!	#DIV/0!	#DIV/0!
	(sonstige)																															#DIV/0!	#DIV/0!	#DIV/0!	#DIV/0!	#DIV/0!	#DIV/0!	#DIV/0!	#NUM!	#DIV/0!		#DIV/0!	#DIV/0!	#DIV/0!	#DIV/0!
	(sonstige)																															#DIV/0!	#DIV/0!	#DIV/0!	#DIV/0!	#DIV/0!	#DIV/0!	#DIV/0!	#NUM!	#DIV/0!		#DIV/0!	#DIV/0!	#DIV/0!	#DIV/0!
	(sonstige)																															#DIV/0!	#DIV/0!	#DIV/0!	#DIV/0!	#DIV/0!	#DIV/0!	#DIV/0!	#NUM!	#DIV/0!		#DIV/0!	#DIV/0!	#DIV/0!	#DIV/0!

## Sheet: PVC manufacturer SF effluent 1
	measured filter area for particles < 100µm:	Basisdaten																																F-Test			t-Test					Welch's-test
	0.5	sample																														Basic statistics
	measured filter area for particle ≥ 100 µm:																																	significance level F-test:	0.05		significance level t-test:	0.05				significance level Welch's-test:		0.05
	1	sample 1 (for single determination (6s-test) only use column 1)			sample 1			sample 2			sample 3			sample 4			sample 5			sample 6			sample 7			sample 8			sample 9			log10 Øsample	log10 s2sample	F	Fα/2	(log10 s2blank = log10 s2sample) ?	s2p	t	tα	(log10 Øsample > log10 Øblank) ?		t	df	tα	(log10 Øsample > log10 Øblank) ?
		< 100 µm	≥ 100 µm	total	< 100 µm	≥ 100 µm	total	< 100 µm	≥ 100 µm	total	< 100 µm	≥ 100 µm	total	< 100 µm	≥ 100 µm	total	< 100 µm	≥ 100 µm	total	< 100 µm	≥ 100 µm	total	< 100 µm	≥ 100 µm	total	< 100 µm	≥ 100 µm	total	< 100 µm	≥ 100 µm	total
microplastic particles	PE																															#DIV/0!	#DIV/0!	#DIV/0!	#DIV/0!	#DIV/0!	#DIV/0!	#DIV/0!	1.94318	#DIV/0!		#DIV/0!	#DIV/0!	#DIV/0!	#DIV/0!
	PET																															#DIV/0!	#DIV/0!	#DIV/0!	#DIV/0!	#DIV/0!	#DIV/0!	#DIV/0!	1.94318	#DIV/0!		#DIV/0!	#DIV/0!	#DIV/0!	#DIV/0!
	PP																															#DIV/0!	#DIV/0!	#DIV/0!	#DIV/0!	#DIV/0!	#DIV/0!	#DIV/0!	1.94318	#DIV/0!		#DIV/0!	#DIV/0!	#DIV/0!	#DIV/0!
	PS																															#DIV/0!	#DIV/0!	#DIV/0!	#DIV/0!	#DIV/0!	#DIV/0!	#DIV/0!	1.94318	#DIV/0!		#DIV/0!	#DIV/0!	#DIV/0!	#DIV/0!
	PVC	446	104	2.99826																												2.99826	#DIV/0!	#DIV/0!	#DIV/0!	#DIV/0!	#DIV/0!	#DIV/0!	1.89458	#DIV/0!		#DIV/0!	#DIV/0!	#DIV/0!	#DIV/0!
	ABS																															#DIV/0!	#DIV/0!	#DIV/0!	#DIV/0!	#DIV/0!	#DIV/0!	#DIV/0!	1.94318	#DIV/0!		#DIV/0!	#DIV/0!	#DIV/0!	#DIV/0!
	PU																															#DIV/0!	#DIV/0!	#DIV/0!	#DIV/0!	#DIV/0!	#DIV/0!	#DIV/0!	1.94318	#DIV/0!		#DIV/0!	#DIV/0!	#DIV/0!	#DIV/0!
	PC																															#DIV/0!	#DIV/0!	#DIV/0!	#DIV/0!	#DIV/0!	#DIV/0!	#DIV/0!	1.94318	#DIV/0!		#DIV/0!	#DIV/0!	#DIV/0!	#DIV/0!
	SAN																															#DIV/0!	#DIV/0!	#DIV/0!	#DIV/0!	#DIV/0!	#DIV/0!	#DIV/0!	1.94318	#DIV/0!		#DIV/0!	#DIV/0!	#DIV/0!	#DIV/0!
	PTFE/PFA																															#DIV/0!	#DIV/0!	#DIV/0!	#DIV/0!	#DIV/0!	#DIV/0!	#DIV/0!	#NUM!	#DIV/0!		#DIV/0!	#DIV/0!	#DIV/0!	#DIV/0!
	(sonstige)																															#DIV/0!	#DIV/0!	#DIV/0!	#DIV/0!	#DIV/0!	#DIV/0!	#DIV/0!	2.01505	#DIV/0!		#DIV/0!	#DIV/0!	#DIV/0!	#DIV/0!
	(sonstige)																															#DIV/0!	#DIV/0!	#DIV/0!	#DIV/0!	#DIV/0!	#DIV/0!	#DIV/0!	#NUM!	#DIV/0!		#DIV/0!	#DIV/0!	#DIV/0!	#DIV/0!
	(sonstige)																															#DIV/0!	#DIV/0!	#DIV/0!	#DIV/0!	#DIV/0!	#DIV/0!	#DIV/0!	#NUM!	#DIV/0!		#DIV/0!	#DIV/0!	#DIV/0!	#DIV/0!
microplastic fibres	PE																															#DIV/0!	#DIV/0!	#DIV/0!	#DIV/0!	#DIV/0!	#DIV/0!	#DIV/0!	1.94318	#DIV/0!		#DIV/0!	#DIV/0!	#DIV/0!	#DIV/0!
	PET																															#DIV/0!	#DIV/0!	#DIV/0!	#DIV/0!	#DIV/0!	#DIV/0!	#DIV/0!	1.94318	#DIV/0!		#DIV/0!	#DIV/0!	#DIV/0!	#DIV/0!
	PP																															#DIV/0!	#DIV/0!	#DIV/0!	#DIV/0!	#DIV/0!	#DIV/0!	#DIV/0!	1.94318	#DIV/0!		#DIV/0!	#DIV/0!	#DIV/0!	#DIV/0!
	PS																															#DIV/0!	#DIV/0!	#DIV/0!	#DIV/0!	#DIV/0!	#DIV/0!	#DIV/0!	1.94318	#DIV/0!		#DIV/0!	#DIV/0!	#DIV/0!	#DIV/0!
	PVC																															#DIV/0!	#DIV/0!	#DIV/0!	#DIV/0!	#DIV/0!	#DIV/0!	#DIV/0!	1.94318	#DIV/0!		#DIV/0!	#DIV/0!	#DIV/0!	#DIV/0!
	ABS																															#DIV/0!	#DIV/0!	#DIV/0!	#DIV/0!	#DIV/0!	#DIV/0!	#DIV/0!	1.94318	#DIV/0!		#DIV/0!	#DIV/0!	#DIV/0!	#DIV/0!
	PU																															#DIV/0!	#DIV/0!	#DIV/0!	#DIV/0!	#DIV/0!	#DIV/0!	#DIV/0!	1.94318	#DIV/0!		#DIV/0!	#DIV/0!	#DIV/0!	#DIV/0!
	PC																															#DIV/0!	#DIV/0!	#DIV/0!	#DIV/0!	#DIV/0!	#DIV/0!	#DIV/0!	1.94318	#DIV/0!		#DIV/0!	#DIV/0!	#DIV/0!	#DIV/0!
	SAN																															#DIV/0!	#DIV/0!	#DIV/0!	#DIV/0!	#DIV/0!	#DIV/0!	#DIV/0!	1.94318	#DIV/0!		#DIV/0!	#DIV/0!	#DIV/0!	#DIV/0!
	PTFE/PFA																															#DIV/0!	#DIV/0!	#DIV/0!	#DIV/0!	#DIV/0!	#DIV/0!	#DIV/0!	#NUM!	#DIV/0!		#DIV/0!	#DIV/0!	#DIV/0!	#DIV/0!
	(sonstige)																															#DIV/0!	#DIV/0!	#DIV/0!	#DIV/0!	#DIV/0!	#DIV/0!	#DIV/0!	#NUM!	#DIV/0!		#DIV/0!	#DIV/0!	#DIV/0!	#DIV/0!
	(sonstige)																															#DIV/0!	#DIV/0!	#DIV/0!	#DIV/0!	#DIV/0!	#DIV/0!	#DIV/0!	#NUM!	#DIV/0!		#DIV/0!	#DIV/0!	#DIV/0!	#DIV/0!
	(sonstige)																															#DIV/0!	#DIV/0!	#DIV/0!	#DIV/0!	#DIV/0!	#DIV/0!	#DIV/0!	#NUM!	#DIV/0!		#DIV/0!	#DIV/0!	#DIV/0!	#DIV/0!
pigmented particles	copper phtalocyanine																															#DIV/0!	#DIV/0!	#DIV/0!	#DIV/0!	#DIV/0!	#DIV/0!	#DIV/0!	1.94318	#DIV/0!		#DIV/0!	#DIV/0!	#DIV/0!	#DIV/0!
	blue																															#DIV/0!	#DIV/0!	#DIV/0!	#DIV/0!	#DIV/0!	#DIV/0!	#DIV/0!	1.94318	#DIV/0!		#DIV/0!	#DIV/0!	#DIV/0!	#DIV/0!
	red																															#DIV/0!	#DIV/0!	#DIV/0!	#DIV/0!	#DIV/0!	#DIV/0!	#DIV/0!	1.94318	#DIV/0!		#DIV/0!	#DIV/0!	#DIV/0!	#DIV/0!
	orange																															#DIV/0!	#DIV/0!	#DIV/0!	#DIV/0!	#DIV/0!	#DIV/0!	#DIV/0!	1.94318	#DIV/0!		#DIV/0!	#DIV/0!	#DIV/0!	#DIV/0!
	yellow																															#DIV/0!	#DIV/0!	#DIV/0!	#DIV/0!	#DIV/0!	#DIV/0!	#DIV/0!	1.94318	#DIV/0!		#DIV/0!	#DIV/0!	#DIV/0!	#DIV/0!
	reactive black																															#DIV/0!	#DIV/0!	#DIV/0!	#DIV/0!	#DIV/0!	#DIV/0!	#DIV/0!	1.94318	#DIV/0!		#DIV/0!	#DIV/0!	#DIV/0!	#DIV/0!
	TiO2																															#DIV/0!	#DIV/0!	#DIV/0!	#DIV/0!	#DIV/0!	#DIV/0!	#DIV/0!	1.94318	#DIV/0!		#DIV/0!	#DIV/0!	#DIV/0!	#DIV/0!
	Indigo																															#DIV/0!	#DIV/0!	#DIV/0!	#DIV/0!	#DIV/0!	#DIV/0!	#DIV/0!	1.94318	#DIV/0!		#DIV/0!	#DIV/0!	#DIV/0!	#DIV/0!
	(sonstige)																															#DIV/0!	#DIV/0!	#DIV/0!	#DIV/0!	#DIV/0!	#DIV/0!	#DIV/0!	#NUM!	#DIV/0!		#DIV/0!	#DIV/0!	#DIV/0!	#DIV/0!
	(sonstige)																															#DIV/0!	#DIV/0!	#DIV/0!	#DIV/0!	#DIV/0!	#DIV/0!	#DIV/0!	#NUM!	#DIV/0!		#DIV/0!	#DIV/0!	#DIV/0!	#DIV/0!
	(sonstige)																															#DIV/0!	#DIV/0!	#DIV/0!	#DIV/0!	#DIV/0!	#DIV/0!	#DIV/0!	#NUM!	#DIV/0!		#DIV/0!	#DIV/0!	#DIV/0!	#DIV/0!
pigmented fibres	copper phtalocyanine																															#DIV/0!	#DIV/0!	#DIV/0!	#DIV/0!	#DIV/0!	#DIV/0!	#DIV/0!	1.94318	#DIV/0!		#DIV/0!	#DIV/0!	#DIV/0!	#DIV/0!
	blue																															#DIV/0!	#DIV/0!	#DIV/0!	#DIV/0!	#DIV/0!	#DIV/0!	#DIV/0!	1.94318	#DIV/0!		#DIV/0!	#DIV/0!	#DIV/0!	#DIV/0!
	red																															#DIV/0!	#DIV/0!	#DIV/0!	#DIV/0!	#DIV/0!	#DIV/0!	#DIV/0!	1.94318	#DIV/0!		#DIV/0!	#DIV/0!	#DIV/0!	#DIV/0!
	orange																															#DIV/0!	#DIV/0!	#DIV/0!	#DIV/0!	#DIV/0!	#DIV/0!	#DIV/0!	1.94318	#DIV/0!		#DIV/0!	#DIV/0!	#DIV/0!	#DIV/0!
	yellow																															#DIV/0!	#DIV/0!	#DIV/0!	#DIV/0!	#DIV/0!	#DIV/0!	#DIV/0!	1.94318	#DIV/0!		#DIV/0!	#DIV/0!	#DIV/0!	#DIV/0!
	reactive black																															#DIV/0!	#DIV/0!	#DIV/0!	#DIV/0!	#DIV/0!	#DIV/0!	#DIV/0!	1.94318	#DIV/0!		#DIV/0!	#DIV/0!	#DIV/0!	#DIV/0!
	TiO2																															#DIV/0!	#DIV/0!	#DIV/0!	#DIV/0!	#DIV/0!	#DIV/0!	#DIV/0!	1.94318	#DIV/0!		#DIV/0!	#DIV/0!	#DIV/0!	#DIV/0!
	Indigo																															#DIV/0!	#DIV/0!	#DIV/0!	#DIV/0!	#DIV/0!	#DIV/0!	#DIV/0!	1.94318	#DIV/0!		#DIV/0!	#DIV/0!	#DIV/0!	#DIV/0!
	(sonstige)																															#DIV/0!	#DIV/0!	#DIV/0!	#DIV/0!	#DIV/0!	#DIV/0!	#DIV/0!	#NUM!	#DIV/0!		#DIV/0!	#DIV/0!	#DIV/0!	#DIV/0!
	(sonstige)																															#DIV/0!	#DIV/0!	#DIV/0!	#DIV/0!	#DIV/0!	#DIV/0!	#DIV/0!	#NUM!	#DIV/0!		#DIV/0!	#DIV/0!	#DIV/0!	#DIV/0!
	(sonstige)																															#DIV/0!	#DIV/0!	#DIV/0!	#DIV/0!	#DIV/0!	#DIV/0!	#DIV/0!	#NUM!	#DIV/0!		#DIV/0!	#DIV/0!	#DIV/0!	#DIV/0!

## Sheet: PVC manufacturer SF effluent 2
	measured filter area for particles < 100µm:	Basisdaten																																F-Test			t-Test					Welch's-test
	0.5	sample																														Basic statistics
	measured filter area for particle ≥ 100 µm:																																	significance level F-test:	0.05		significance level t-test:	0.05				significance level Welch's-test:		0.05
	1	sample 1 (for single determination (6s-test) only use column 1)			sample 1			sample 2			sample 3			sample 4			sample 5			sample 6			sample 7			sample 8			sample 9			log10 Øsample	log10 s2sample	F	Fα/2	(log10 s2blank = log10 s2sample) ?	s2p	t	tα	(log10 Øsample > log10 Øblank) ?		t	df	tα	(log10 Øsample > log10 Øblank) ?
		< 100 µm	≥ 100 µm	total	< 100 µm	≥ 100 µm	total	< 100 µm	≥ 100 µm	total	< 100 µm	≥ 100 µm	total	< 100 µm	≥ 100 µm	total	< 100 µm	≥ 100 µm	total	< 100 µm	≥ 100 µm	total	< 100 µm	≥ 100 µm	total	< 100 µm	≥ 100 µm	total	< 100 µm	≥ 100 µm	total
microplastic particles	PE																															#DIV/0!	#DIV/0!	#DIV/0!	#DIV/0!	#DIV/0!	#DIV/0!	#DIV/0!	1.94318	#DIV/0!		#DIV/0!	#DIV/0!	#DIV/0!	#DIV/0!
	PET																															#DIV/0!	#DIV/0!	#DIV/0!	#DIV/0!	#DIV/0!	#DIV/0!	#DIV/0!	1.94318	#DIV/0!		#DIV/0!	#DIV/0!	#DIV/0!	#DIV/0!
	PP																															#DIV/0!	#DIV/0!	#DIV/0!	#DIV/0!	#DIV/0!	#DIV/0!	#DIV/0!	1.94318	#DIV/0!		#DIV/0!	#DIV/0!	#DIV/0!	#DIV/0!
	PS																															#DIV/0!	#DIV/0!	#DIV/0!	#DIV/0!	#DIV/0!	#DIV/0!	#DIV/0!	1.94318	#DIV/0!		#DIV/0!	#DIV/0!	#DIV/0!	#DIV/0!
	PVC	844	16	3.23147																												3.23147	#DIV/0!	#DIV/0!	#DIV/0!	#DIV/0!	#DIV/0!	#DIV/0!	1.89458	#DIV/0!		#DIV/0!	#DIV/0!	#DIV/0!	#DIV/0!
	ABS																															#DIV/0!	#DIV/0!	#DIV/0!	#DIV/0!	#DIV/0!	#DIV/0!	#DIV/0!	1.94318	#DIV/0!		#DIV/0!	#DIV/0!	#DIV/0!	#DIV/0!
	PU																															#DIV/0!	#DIV/0!	#DIV/0!	#DIV/0!	#DIV/0!	#DIV/0!	#DIV/0!	1.94318	#DIV/0!		#DIV/0!	#DIV/0!	#DIV/0!	#DIV/0!
	PC																															#DIV/0!	#DIV/0!	#DIV/0!	#DIV/0!	#DIV/0!	#DIV/0!	#DIV/0!	1.94318	#DIV/0!		#DIV/0!	#DIV/0!	#DIV/0!	#DIV/0!
	SAN																															#DIV/0!	#DIV/0!	#DIV/0!	#DIV/0!	#DIV/0!	#DIV/0!	#DIV/0!	1.94318	#DIV/0!		#DIV/0!	#DIV/0!	#DIV/0!	#DIV/0!
	PTFE/PFA																															#DIV/0!	#DIV/0!	#DIV/0!	#DIV/0!	#DIV/0!	#DIV/0!	#DIV/0!	#NUM!	#DIV/0!		#DIV/0!	#DIV/0!	#DIV/0!	#DIV/0!
	(sonstige)																															#DIV/0!	#DIV/0!	#DIV/0!	#DIV/0!	#DIV/0!	#DIV/0!	#DIV/0!	2.01505	#DIV/0!		#DIV/0!	#DIV/0!	#DIV/0!	#DIV/0!
	(sonstige)																															#DIV/0!	#DIV/0!	#DIV/0!	#DIV/0!	#DIV/0!	#DIV/0!	#DIV/0!	#NUM!	#DIV/0!		#DIV/0!	#DIV/0!	#DIV/0!	#DIV/0!
	(sonstige)																															#DIV/0!	#DIV/0!	#DIV/0!	#DIV/0!	#DIV/0!	#DIV/0!	#DIV/0!	#NUM!	#DIV/0!		#DIV/0!	#DIV/0!	#DIV/0!	#DIV/0!
microplastic fibres	PE																															#DIV/0!	#DIV/0!	#DIV/0!	#DIV/0!	#DIV/0!	#DIV/0!	#DIV/0!	1.94318	#DIV/0!		#DIV/0!	#DIV/0!	#DIV/0!	#DIV/0!
	PET																															#DIV/0!	#DIV/0!	#DIV/0!	#DIV/0!	#DIV/0!	#DIV/0!	#DIV/0!	1.94318	#DIV/0!		#DIV/0!	#DIV/0!	#DIV/0!	#DIV/0!
	PP																															#DIV/0!	#DIV/0!	#DIV/0!	#DIV/0!	#DIV/0!	#DIV/0!	#DIV/0!	1.94318	#DIV/0!		#DIV/0!	#DIV/0!	#DIV/0!	#DIV/0!
	PS																															#DIV/0!	#DIV/0!	#DIV/0!	#DIV/0!	#DIV/0!	#DIV/0!	#DIV/0!	1.94318	#DIV/0!		#DIV/0!	#DIV/0!	#DIV/0!	#DIV/0!
	PVC																															#DIV/0!	#DIV/0!	#DIV/0!	#DIV/0!	#DIV/0!	#DIV/0!	#DIV/0!	1.94318	#DIV/0!		#DIV/0!	#DIV/0!	#DIV/0!	#DIV/0!
	ABS																															#DIV/0!	#DIV/0!	#DIV/0!	#DIV/0!	#DIV/0!	#DIV/0!	#DIV/0!	1.94318	#DIV/0!		#DIV/0!	#DIV/0!	#DIV/0!	#DIV/0!
	PU																															#DIV/0!	#DIV/0!	#DIV/0!	#DIV/0!	#DIV/0!	#DIV/0!	#DIV/0!	1.94318	#DIV/0!		#DIV/0!	#DIV/0!	#DIV/0!	#DIV/0!
	PC																															#DIV/0!	#DIV/0!	#DIV/0!	#DIV/0!	#DIV/0!	#DIV/0!	#DIV/0!	1.94318	#DIV/0!		#DIV/0!	#DIV/0!	#DIV/0!	#DIV/0!
	SAN																															#DIV/0!	#DIV/0!	#DIV/0!	#DIV/0!	#DIV/0!	#DIV/0!	#DIV/0!	1.94318	#DIV/0!		#DIV/0!	#DIV/0!	#DIV/0!	#DIV/0!
	PTFE/PFA																															#DIV/0!	#DIV/0!	#DIV/0!	#DIV/0!	#DIV/0!	#DIV/0!	#DIV/0!	#NUM!	#DIV/0!		#DIV/0!	#DIV/0!	#DIV/0!	#DIV/0!
	(sonstige)																															#DIV/0!	#DIV/0!	#DIV/0!	#DIV/0!	#DIV/0!	#DIV/0!	#DIV/0!	#NUM!	#DIV/0!		#DIV/0!	#DIV/0!	#DIV/0!	#DIV/0!
	(sonstige)																															#DIV/0!	#DIV/0!	#DIV/0!	#DIV/0!	#DIV/0!	#DIV/0!	#DIV/0!	#NUM!	#DIV/0!		#DIV/0!	#DIV/0!	#DIV/0!	#DIV/0!
	(sonstige)																															#DIV/0!	#DIV/0!	#DIV/0!	#DIV/0!	#DIV/0!	#DIV/0!	#DIV/0!	#NUM!	#DIV/0!		#DIV/0!	#DIV/0!	#DIV/0!	#DIV/0!
pigmented particles	copper phtalocyanine																															#DIV/0!	#DIV/0!	#DIV/0!	#DIV/0!	#DIV/0!	#DIV/0!	#DIV/0!	1.94318	#DIV/0!		#DIV/0!	#DIV/0!	#DIV/0!	#DIV/0!
	blue																															#DIV/0!	#DIV/0!	#DIV/0!	#DIV/0!	#DIV/0!	#DIV/0!	#DIV/0!	1.94318	#DIV/0!		#DIV/0!	#DIV/0!	#DIV/0!	#DIV/0!
	red																															#DIV/0!	#DIV/0!	#DIV/0!	#DIV/0!	#DIV/0!	#DIV/0!	#DIV/0!	1.94318	#DIV/0!		#DIV/0!	#DIV/0!	#DIV/0!	#DIV/0!
	orange																															#DIV/0!	#DIV/0!	#DIV/0!	#DIV/0!	#DIV/0!	#DIV/0!	#DIV/0!	1.94318	#DIV/0!		#DIV/0!	#DIV/0!	#DIV/0!	#DIV/0!
	yellow																															#DIV/0!	#DIV/0!	#DIV/0!	#DIV/0!	#DIV/0!	#DIV/0!	#DIV/0!	1.94318	#DIV/0!		#DIV/0!	#DIV/0!	#DIV/0!	#DIV/0!
	reactive black																															#DIV/0!	#DIV/0!	#DIV/0!	#DIV/0!	#DIV/0!	#DIV/0!	#DIV/0!	1.94318	#DIV/0!		#DIV/0!	#DIV/0!	#DIV/0!	#DIV/0!
	TiO2																															#DIV/0!	#DIV/0!	#DIV/0!	#DIV/0!	#DIV/0!	#DIV/0!	#DIV/0!	1.94318	#DIV/0!		#DIV/0!	#DIV/0!	#DIV/0!	#DIV/0!
	Indigo																															#DIV/0!	#DIV/0!	#DIV/0!	#DIV/0!	#DIV/0!	#DIV/0!	#DIV/0!	1.94318	#DIV/0!		#DIV/0!	#DIV/0!	#DIV/0!	#DIV/0!
	(sonstige)																															#DIV/0!	#DIV/0!	#DIV/0!	#DIV/0!	#DIV/0!	#DIV/0!	#DIV/0!	#NUM!	#DIV/0!		#DIV/0!	#DIV/0!	#DIV/0!	#DIV/0!
	(sonstige)																															#DIV/0!	#DIV/0!	#DIV/0!	#DIV/0!	#DIV/0!	#DIV/0!	#DIV/0!	#NUM!	#DIV/0!		#DIV/0!	#DIV/0!	#DIV/0!	#DIV/0!
	(sonstige)																															#DIV/0!	#DIV/0!	#DIV/0!	#DIV/0!	#DIV/0!	#DIV/0!	#DIV/0!	#NUM!	#DIV/0!		#DIV/0!	#DIV/0!	#DIV/0!	#DIV/0!
pigmented fibres	copper phtalocyanine																															#DIV/0!	#DIV/0!	#DIV/0!	#DIV/0!	#DIV/0!	#DIV/0!	#DIV/0!	1.94318	#DIV/0!		#DIV/0!	#DIV/0!	#DIV/0!	#DIV/0!
	blue																															#DIV/0!	#DIV/0!	#DIV/0!	#DIV/0!	#DIV/0!	#DIV/0!	#DIV/0!	1.94318	#DIV/0!		#DIV/0!	#DIV/0!	#DIV/0!	#DIV/0!
	red																															#DIV/0!	#DIV/0!	#DIV/0!	#DIV/0!	#DIV/0!	#DIV/0!	#DIV/0!	1.94318	#DIV/0!		#DIV/0!	#DIV/0!	#DIV/0!	#DIV/0!
	orange																															#DIV/0!	#DIV/0!	#DIV/0!	#DIV/0!	#DIV/0!	#DIV/0!	#DIV/0!	1.94318	#DIV/0!		#DIV/0!	#DIV/0!	#DIV/0!	#DIV/0!
	yellow																															#DIV/0!	#DIV/0!	#DIV/0!	#DIV/0!	#DIV/0!	#DIV/0!	#DIV/0!	1.94318	#DIV/0!		#DIV/0!	#DIV/0!	#DIV/0!	#DIV/0!
	reactive black																															#DIV/0!	#DIV/0!	#DIV/0!	#DIV/0!	#DIV/0!	#DIV/0!	#DIV/0!	1.94318	#DIV/0!		#DIV/0!	#DIV/0!	#DIV/0!	#DIV/0!
	TiO2																															#DIV/0!	#DIV/0!	#DIV/0!	#DIV/0!	#DIV/0!	#DIV/0!	#DIV/0!	1.94318	#DIV/0!		#DIV/0!	#DIV/0!	#DIV/0!	#DIV/0!
	Indigo																															#DIV/0!	#DIV/0!	#DIV/0!	#DIV/0!	#DIV/0!	#DIV/0!	#DIV/0!	1.94318	#DIV/0!		#DIV/0!	#DIV/0!	#DIV/0!	#DIV/0!
	(sonstige)																															#DIV/0!	#DIV/0!	#DIV/0!	#DIV/0!	#DIV/0!	#DIV/0!	#DIV/0!	#NUM!	#DIV/0!		#DIV/0!	#DIV/0!	#DIV/0!	#DIV/0!
	(sonstige)																															#DIV/0!	#DIV/0!	#DIV/0!	#DIV/0!	#DIV/0!	#DIV/0!	#DIV/0!	#NUM!	#DIV/0!		#DIV/0!	#DIV/0!	#DIV/0!	#DIV/0!
	(sonstige)																															#DIV/0!	#DIV/0!	#DIV/0!	#DIV/0!	#DIV/0!	#DIV/0!	#DIV/0!	#NUM!	#DIV/0!		#DIV/0!	#DIV/0!	#DIV/0!	#DIV/0!

[truncated: 2 more sheets: PVC manufacturer SF effluent 3, auxiliary table]
